# Supplementary material for: OLG: a new potential reference material for apatite (U–Th)/He dating
Source: Royal Society of Chemistry journal article supplement (doi:10.1039/d5ja00246j), 2025-11-25
Supplement: d5ja00246j1.xlsx [file d5ja00246j1.xlsx]

## Sheet: Sheet1
Sample	Spot	V51_ppm_mean	V51_ppm_2SE(int)	Mn55_ppm_mean	Mn55_ppm_2SE(int)	As75_ppm_mean	As75_ppm_2SE(int)	Sr88_ppm_mean	Sr88_ppm_2SE(int)	Y89_ppm_mean	Y89_ppm_2SE(int)	Zr90_ppm_mean	Zr90_ppm_2SE(int)	La139_ppm_mean	La139_ppm_2SE(int)	Ce140_ppm_mean	Ce140_ppm_2SE(int)	Pr141_ppm_mean	Pr141_ppm_2SE(int)	Nd146_ppm_mean	Nd146_ppm_2SE(int)	Sm147_ppm_mean	Sm147_ppm_2SE(int)	Eu153_ppm_mean	Eu153_ppm_2SE(int)	Gd157_ppm_mean	Gd157_ppm_2SE(int)	Tb159_ppm_mean	Tb159_ppm_2SE(int)	Dy163_ppm_mean	Dy163_ppm_2SE(int)	Ho165_ppm_mean	Ho165_ppm_2SE(int)	Er166_ppm_mean	Er166_ppm_2SE(int)	Tm169_ppm_mean	Tm169_ppm_2SE(int)	Yb172_ppm_mean	Yb172_ppm_2SE(int)	Lu175_ppm_mean	Lu175_ppm_2SE(int)	Pb204_ppm_mean	Pb204_ppm_2SE(int)	Pb206_ppm_mean	Pb206_ppm_2SE(int)	Pb207_ppm_mean	Pb207_ppm_2SE(int)	Pb208_ppm_mean	Pb208_ppm_2SE(int)
X1Y1Z1	X1Y1Z1_001	13.9447	0.915444	137.848	3.2287	54.2985	3.2666	1626.71	16.3868	924.515	12.1716	1.94383	0.349841	2701.95	31.7401	6727.74	74.6239	812.53	10.4532	3011.95	36.1945	419.812	9.81072	72.1681	1.76316	282.939	6.15267	32.4861	0.896016	169.925	4.49572	31.7028	0.87032	84.6199	2.59553	11.0579	0.571639	63.8402	2.68419	8.23098	0.314773	4.65062	4.8146	69.3571	1.46943	12.2493	0.378147	75.1194	1.24587
X1Y1Z1	X1Y1Z1_002	14.8105	0.952684	138.86	3.29197	55.8789	3.13319	1626.04	17.769	923.59	11.2694	1.8922	0.357454	2710.59	30.8355	6752.85	63.9936	813.959	9.64273	3035.75	37.3184	423.52	8.80209	72.8528	1.6728	284.025	7.58456	32.7989	0.94278	168.218	4.59918	31.461	0.83524	90.0982	2.8171	11.1428	0.487665	62.4119	3.0749	8.36053	0.350445	4.39756	4.18233	65.9842	1.31232	10.6018	0.357613	72.5207	1.15352
X1Y1Z1	X1Y1Z1_003	14.7046	0.84484	141.717	3.40303	55.6585	2.9657	1637.91	18.0048	924.295	11.5088	1.99788	0.365161	2677.5	28.6679	6748.07	70.5744	807.632	9.92478	3052.84	41.0934	428.629	9.60715	71.2632	1.93331	284.558	8.05146	32.4822	0.889453	169.854	4.34458	31.0787	0.820867	87.6228	2.88833	11.3638	0.496738	63.1029	2.9206	8.14363	0.328776	7.69155	4.55886	65.99	1.21775	10.8766	0.361579	72.0599	0.980052
X1Y1Z1	X1Y1Z1_004	15.0131	0.820501	140.725	2.91615	55.9525	3.09032	1616.36	18.0256	910.546	9.81808	1.55478	0.336819	2667.4	29.8121	6695.83	65.2197	807.526	9.17473	3026.7	38.1207	424.693	7.91376	69.9212	1.83217	281.844	6.06696	32.4612	0.807591	167.103	4.14327	31.5249	0.952611	86.0387	2.44471	11.1672	0.499101	64.8578	2.30673	8.42471	0.318283	7.35109	4.24729	65.6653	1.14215	10.8976	0.302209	72.3013	1.10349
X1Y1Z1	X1Y1Z1_005	14.5409	0.857138	142.118	3.23959	53.5754	3.12973	1625.36	15.9193	914.563	11.3034	1.88236	0.33876	2693.81	28.257	6682.22	61.3148	807.495	7.94625	3013.1	34.7523	429.555	8.42793	70.8528	1.7772	285.21	5.93377	31.8734	0.94665	168.592	4.11007	31.701	0.868195	88.5997	2.55182	10.8349	0.469677	64.0129	2.39116	7.97427	0.283889	9.1302	4.93715	67.9401	1.38058	12.8909	0.302777	74.5274	1.01687
X1Y1Z1	X1Y1Z1_006	14.389	0.932439	142.056	3.66961	57.1995	2.94629	1623.52	17.325	925.221	11.0617	1.83601	0.350255	2682.68	25.1676	6725.31	65.7769	808.139	9.89389	2998.72	38.4035	427.934	9.47931	72.0929	1.67948	279.902	6.9359	31.5952	1.04228	170.734	4.92046	31.7814	0.887674	88.0579	2.92419	10.7023	0.477204	64.88	2.81484	8.07409	0.345345	3.75492	4.06067	68.0147	1.27519	11.9469	0.328564	73.7592	1.12366
X1Y1Z1	X1Y1Z1_007	14.2773	0.863473	143.67	3.39449	53.9664	3.68322	1623.97	17.014	897.094	9.78644	1.96034	0.35291	2601.45	29.7587	6540.08	64.9838	792.138	7.92215	2946.27	34.3949	414.72	8.05534	70.2222	1.69847	287.142	6.81009	31.7418	0.90084	163.368	4.68143	31.3847	0.965935	86.6542	2.82338	10.8227	0.511305	62.2534	2.36743	8.2314	0.343546	3.62741	4.23813	64.0309	1.31187	11.0844	0.341415	70.6768	1.04109
X1Y1Z1	X1Y1Z1_008	14.2717	0.9455	136.537	2.97419	58.1673	3.56173	1636.09	18.3906	917.815	10.4371	1.91526	0.312105	2717.12	30.6415	6803.6	76.5694	810.894	8.22456	3053.51	33.37	420.411	9.08151	71.9236	1.97044	284.625	6.51186	32.2831	0.918267	169.458	4.49141	31.7532	0.92071	89.9814	2.63132	11.0922	0.565884	61.0466	2.46539	8.25979	0.306371	6.54396	4.91657	64.6484	1.17267	10.3303	0.335108	72.2712	0.920134
X1Y1Z1	X1Y1Z1_009	13.245	0.869698	136.464	3.68299	57.9626	3.90644	1678.36	17.9243	905.807	10.4989	1.73647	0.364345	2726.49	24.0703	6728.12	68.261	809.698	10.0806	3007.63	33.2223	423.474	8.30761	69.7928	1.8271	288.551	7.69929	31.8123	0.819124	170.162	3.66374	30.7533	0.881204	84.6726	2.37544	10.7059	0.525812	62.3201	2.68114	8.31572	0.354625	6.87389	5.2107	63.7279	1.19726	10.1302	0.326852	69.3641	1.21368
X1Y1Z1	X1Y1Z1_010	14.3015	0.818203	141.729	3.00556	58.2879	3.24075	1601.92	17.2839	906.141	9.78684	1.97572	0.344155	2686.75	33.475	6721.13	74.1356	810.585	8.46855	3027.21	30.2867	418.891	8.37841	69.3547	1.81429	283.327	7.53812	32.2486	0.842534	171.468	4.40007	32.1124	0.90329	85.0596	2.39828	10.8084	0.490219	64.5167	2.58142	7.9334	0.311881	6.1028	5.2072	66.9207	1.12424	12.6007	0.370975	74.9559	1.1789
X1Y1Z1	X1Y1Z1_011	14.2154	0.903501	139.151	3.35987	57.2426	3.44312	1632.46	16.7527	913.182	11.0665	1.94965	0.326143	2699.58	27.1359	6741.78	62.1423	816.132	9.30407	3044.11	38.4403	425.268	8.53324	71.9747	1.92171	287.151	7.3227	32.2278	0.934251	175.778	4.23874	31.9036	0.813198	89.3867	2.67209	10.6187	0.575251	62.718	2.89498	8.07554	0.331804	4.60862	5.87895	70.0724	1.16886	12.7288	0.341717	76.459	1.1291
X1Y1Z1	X1Y1Z1_012	15.2571	0.885187	137.519	3.1458	55.9627	3.24593	1618.52	16.5537	902.09	10.8661	2.15693	0.337571	2708.65	29.7267	6747.51	72.0834	808.236	8.32434	3025.58	33.8919	424.136	8.7432	71.0765	1.97835	286.825	7.09616	31.6607	0.814118	171.118	4.1801	31.2949	0.94521	84.8773	2.75127	10.9706	0.488452	63.6859	2.72961	8.26781	0.339968	7.78875	6.31326	67.3993	1.16017	11.3975	0.339184	73.3805	0.979267
X1Y1Z1	X1Y1Z1_013	13.7494	0.792252	136.602	3.60111	56.8888	3.58638	1635.75	20.2397	893.204	12.1898	2.01588	0.384928	2661.83	29.6648	6723.55	71.3178	802.309	8.92333	2983.15	34.5327	422.379	9.18738	71.0521	1.81707	287.542	6.61465	32.2018	0.862875	172.234	4.6599	31.4863	0.851039	86.8329	2.76058	11.4367	0.523282	62.8447	2.79779	8.31841	0.330064	5.81116	4.94258	65.94	1.19001	11.2567	0.328047	71.8009	1.03995
X1Y1Z1	X1Y1Z1_014	14.4475	0.881763	130.633	3.39842	54.9065	3.13329	1682.41	18.5797	903.758	8.67667	1.98696	0.401417	2768.24	25.8592	6862.77	59.2391	811.55	8.74709	3029.41	30.1661	422.346	7.46366	73.4881	1.92562	284.181	7.92083	31.6289	0.96876	169.129	4.2459	31.8896	0.879492	88.6572	2.08716	10.754	0.511981	63.628	2.40543	8.21154	0.322178	7.31202	4.94814	64.1178	1.34334	9.88952	0.27204	69.94	1.12998
X1Y1Z1	X1Y1Z1_015	15.5138	0.860912	136.537	3.36883	55.8931	2.90263	1611.7	18.7142	896.482	10.5956	1.91117	0.320277	2652.54	30.9141	6716.39	61.1615	803.889	7.48699	3013.2	34.7371	424.566	7.79621	71.0614	1.8051	284.074	7.23631	31.2653	0.865211	168.381	4.05491	31.1257	1.0069	84.6849	2.39842	10.7026	0.47031	62.3672	2.59828	8.00385	0.329541	12.5856	5.59947	66.9099	1.35241	11.0546	0.332509	72.5147	1.24972
X1Y1Z1	X1Y1Z1_016	14.2767	0.920002	127.201	3.33538	54.8295	3.00885	1684.6	16.5386	906.824	10.8555	1.98873	0.339769	2752.53	28.8646	6858.66	64.0979	807.345	9.13765	3029.83	37.1359	430.332	9.07055	71.0966	1.76388	289.5	7.63761	31.4249	0.926872	167.615	4.63952	30.9907	0.850866	86.0341	2.57618	11.0322	0.444295	63.9778	2.88936	8.18499	0.370087	7.02418	4.17513	62.8255	1.18322	9.79678	0.318775	68.7285	1.09897
X1Y1Z1	X1Y1Z1_017	14.8551	0.895038	138.616	3.17587	54.4539	3.17573	1618.84	19.1534	881.126	12.9348	2.15502	0.360007	2608.94	26.9399	6624.83	68.1671	788.832	9.14461	2983.29	35.6882	421.504	9.4972	69.1291	1.8518	282.175	6.31807	30.6781	0.785281	168.066	4.25347	30.2359	0.885608	84.721	2.61324	10.2453	0.532396	61.7118	2.48917	8.24371	0.318039	11.0811	5.67564	64.6779	1.16741	10.725	0.282333	70.8802	0.956502
X1Y1Z1	X1Y1Z1_018	14.3252	0.79064	138.711	3.54929	57.4791	3.23716	1642.12	18.2384	899.672	9.39215	1.61777	0.299767	2700.64	25.2744	6796.07	59.5204	802.434	8.81361	3028.01	34.8408	429.421	7.3687	72.1585	1.88473	287.679	7.72881	31.4628	0.889613	168.296	4.40854	31.2686	0.789241	88.0444	2.76956	10.9349	0.472948	61.3922	2.58156	8.31168	0.317096	9.35293	5.08527	65.737	1.48969	11.0201	0.319758	72.2048	1.19868
X1Y1Z1	X1Y1Z1_019	14.9615	1.03023	137.159	2.94943	54.0086	3.09832	1667.99	16.8216	903.829	9.92568	2.07515	0.337551	2732.05	26.929	6769.99	61.1642	813.344	8.73128	3031.22	35.5535	424.024	8.39224	71.4395	1.72588	287.041	7.29369	31.9615	0.992886	172.469	4.21292	32.1609	0.78693	85.8956	2.24238	10.5544	0.505404	62.5689	2.81923	8.01697	0.323559	6.14078	4.73675	64.1849	1.15307	10.071	0.290195	70.9366	1.06574
X1Y1Z1	X1Y1Z1_020	15.0556	0.732262	143.898	3.14857	55.1382	3.24119	1636.07	17.0495	879.609	11.6759	1.9688	0.402145	2633.91	28.4539	6639.02	72.1355	786.521	8.09871	2996.14	34.6796	418.433	8.10384	70.2874	1.69961	277.08	6.82342	31.5375	0.904535	166.734	3.60294	30.5998	0.847708	81.3404	2.54125	10.9061	0.514283	62.2643	2.79481	7.8588	0.329643	3.55869	4.13699	66.6275	1.42137	12.6249	0.345353	72.2324	1.01815
X1Y1Z1	X1Y1Z1_021	12.9175	2.24483	158.023	12.4648	61.0516	11.3144	1653.82	103.82	941.248	51.976	1.31398	0.880123	2407.07	122.936	5714.61	257.095	791.097	31.2902	2874.81	137.964	424.18	29.2848	75.6917	5.71681	293.72	24.754	31.6122	2.7846	161.326	13.0167	32.3789	2.3022	93.4132	8.09041	10.8765	1.41785	64.2755	7.26744	8.37306	0.91094	-2.65853	11.3688	71.8035	3.25713	16.2059	1.14542	80.8104	3.14103
X1Y1Z1	X1Y1Z1_022	16.6025	2.7697	148.784	14.2231	62.3732	8.59119	1666.04	114.184	876.755	53.9978	1.5898	0.819287	2385.48	116.676	5909.85	268.582	815.434	40.4915	3059.25	184.025	449.908	34.1063	64.3122	5.73426	264.462	24.3653	34.5804	3.42641	164.202	17.5592	32.0633	3.32056	87.1836	7.85849	10.4085	1.40634	65.7668	7.69623	8.06299	0.851751	1.25872	15.4935	71.2218	3.82215	16.0439	1.16817	79.6298	3.67125
X1Y1Z1	X1Y1Z1_023	17.9552	3.28941	164.454	17.2325	63.3581	14.2173	1656.43	82.5526	939.31	58.4921	2.25883	1.07047	2534.16	162.417	6110.66	376.757	831.006	42.5675	3020.07	123.087	426.538	28.7086	72.2949	5.86828	286.586	22.628	33.2796	2.95453	177.068	11.8801	34.8089	2.70403	96.9345	9.61341	12.1303	1.50829	63.698	8.23358	8.19522	1.10624	-0.734405	16.2779	76.2688	3.94789	15.6598	0.761175	81.0409	3.0396
X1Y1Z1	X1Y1Z1_024	12.6223	2.37028	143.603	13.2369	63.8304	12.5821	1708.96	103.598	939.583	45.8463	1.09725	0.758254	2430.3	134.968	6081.31	332.769	848.985	38.4686	2892.32	140.837	449.236	27.3723	74.8042	6.80838	295.216	26.7436	30.6338	3.72729	170.389	15.8248	31.1325	2.67859	91.4923	7.22815	9.77534	1.21099	68.5275	8.63256	8.7144	0.886645	-15.1454	0.548659	72.3253	3.23478	14.1106	0.909174	75.0736	3.045
X1Y1Z1	X1Y1Z1_025	13.565	2.98386	147.371	13.2896	63.8811	9.24567	1685.24	60.6611	911.339	32.0347	2.05214	0.894446	2510.76	108.56	6000.58	176.901	797.032	29.9724	2865.41	125.159	407.112	33.0175	73.5577	6.24276	291.242	16.1923	30.7365	2.6024	167.483	10.6287	32.0574	2.4969	92.1997	6.28866	10.8318	1.36069	70.228	8.01883	8.67407	0.808972	5.02384	11.7273	69.307	3.60433	14.5494	0.731814	75.8928	2.73121
X1Y1Z1	X1Y1Z1_026	14.4009	2.38842	158.798	13.2473	51.012	13.4227	1705.06	79.5633	941.246	41.6709	2.7326	1.34186	2446.43	113.534	6038.95	389.569	797.528	46.6822	2968.11	184.969	443.337	36.4606	72.1631	5.71943	283.093	25.0911	33.1701	2.95261	166.896	13.3545	32.4752	2.75235	87.4417	8.59053	11.752	1.46913	72.9117	7.17825	8.01655	0.915638	0.967821	0.0861461	70.9341	2.77058	14.8907	0.767554	78.6604	3.54606
X1Y1Z1	X1Y1Z1_027	15.0195	2.56809	150.083	15.1482	63.091	12.0972	1574.09	74.5635	914.405	45.7099	0.751434	0.547795	2398.48	125.551	5937.9	407.239	797.903	40.2403	2867.63	188.941	426.923	37.128	66.7165	6.42551	277.63	26.0361	33.859	2.54175	169.82	14.1172	29.9035	2.95758	92.2791	8.59347	9.44945	1.10922	58.4597	7.35949	8.27017	0.933015	23.8086	17.1628	73.8446	3.36256	16.1019	1.24406	79.3395	4.26281
X1Y1Z1	X1Y1Z1_028	12.4091	2.17867	144.747	16.043	59.7724	11.3354	1672.76	99.2481	937.767	40.6185	3.08579	1.18219	2450.69	130.078	5753.59	253.763	811.77	40.9134	2987.8	218.818	440.572	39.9769	68.7541	4.6622	279.979	17.9278	33.256	2.95809	179.542	12.7568	31.2186	2.46651	90.6986	7.07159	10.9294	1.54012	67.9456	7.71768	8.47233	0.776227	-1.25419	0.170498	73.957	3.66735	16.6875	0.788021	79.9309	3.06901
X1Y2Z2	X1Y2Z2_001	14.6608	1.018	125.531	2.7379	54.9608	3.34561	1701.46	19.2981	935.168	10.6113	1.81615	0.380776	2706.15	26.3954	6843.18	71.0628	825.331	8.58972	3082.59	32.2512	436.806	8.94535	73.1972	2.01852	291.672	6.88355	33.1047	0.905173	173.337	4.37149	31.8726	0.917318	89.6281	3.06137	11.306	0.516894	65.7978	3.16141	8.53125	0.329321	8.1922	4.59894	63.2862	1.04482	9.39591	0.321422	69.9764	1.01622
X1Y2Z2	X1Y2Z2_002	14.3488	0.981266	108.004	3.08656	64.7713	3.27665	1740.71	21.6937	837.495	9.64942	0.656877	0.189179	2316.78	23.3402	5937.3	55.253	715.677	7.52379	2701.41	29.6753	383.581	8.74929	61.8234	1.84718	252.657	6.36635	28.1386	0.916801	153.04	3.16891	27.8608	0.867876	75.6313	2.37863	10.0066	0.552324	55.9518	2.58244	7.37186	0.360188	10.5031	5.10458	39.2328	0.947171	5.66783	0.259236	23.4229	0.482998
X1Y2Z2	X1Y2Z2_003	14.6425	0.861567	100.246	3.00784	64.7088	4.23352	1726.02	17.8447	1080.28	13.8714	1.33027	0.259439	3001.48	50.1352	7565.28	101.032	906.654	12.4918	3447.21	46.5504	492.594	10.7344	81.227	2.18105	317.332	7.15898	36.2437	1.14126	196.172	4.75411	37.1889	0.97647	96.0783	3.03729	12.5982	0.586991	72.5332	3.15174	9.41489	0.323509	5.23977	4.19948	52.6685	1.44727	6.23986	0.27512	53.9123	1.19313
X1Y2Z2	X1Y2Z2_004	15.3244	0.98557	134.776	3.28403	54.985	2.98585	1646.83	17.8256	895.683	10.2987	2.13898	0.349235	2622.7	26.4802	6613.57	73.8415	802.091	8.6037	3010.77	33.8361	431.89	8.93681	72.4186	1.88449	277.741	7.18324	31.6558	0.901892	168.577	4.60149	30.8993	0.90311	86.8464	2.4515	10.6985	0.53073	64.7945	2.53428	8.0917	0.281512	3.5144	4.16504	62.9774	1.19927	9.65152	0.269745	69.3651	1.09896
X1Y2Z2	X1Y2Z2_005	15.6516	0.94264	143.887	8.30737	58.648	3.34476	1833.57	23.9651	1072.69	12.4861	1.93462	0.325377	3186.59	36.8744	7740.95	91.2748	916.548	10.5301	3430.34	37.6486	490.648	8.99083	81.5126	2.22104	314.984	6.7763	36.3545	1.01987	196.644	4.43401	35.8725	0.969842	99.7266	3.12203	12.9484	0.515699	72.8837	2.97678	9.92064	0.340639	7.81428	5.69379	64.5115	2.28658	12.5747	1.78106	71.8172	2.17258
X1Y2Z2	X1Y2Z2_006	15.0279	0.827989	104.423	2.871	63.4628	3.848	1757.23	21.6425	859.658	9.76854	0.696357	0.210435	2420.49	28.8523	6090.81	69.4224	731.23	8.71511	2773.53	33.1791	385.264	8.82003	64.0404	1.79458	257.721	5.68237	28.403	0.875704	154.362	3.55235	28.3814	0.876969	78.5497	2.516	10.0077	0.445754	58.2145	2.83666	7.6718	0.31526	1.65741	4.03902	36.4514	0.918697	4.59161	0.199006	21.9982	0.505283
X1Y2Z2	X1Y2Z2_007	14.5998	0.985117	108.361	3.06858	66.413	4.28421	1771.37	18.1177	935.174	11.935	1.0897	0.30437	2649.81	26.8968	6617.47	60.3453	796.851	8.06239	3001.06	36.7605	426.264	9.17682	70.3479	1.74059	281.415	7.30876	31.4106	0.868222	173.297	4.20473	31.3294	0.920527	83.6032	2.78476	10.9432	0.487408	61.7657	2.75863	8.19332	0.309051	-3.7236	1.18182	40.4479	0.95023	5.20839	0.219361	26.5136	0.5473
X1Y2Z2	X1Y2Z2_008	14.5031	0.951467	128.772	3.4281	58.0925	3.25615	1686.63	16.6292	915.957	9.92192	1.70278	0.297737	2721.38	27.6193	6783.1	64.0967	821.478	8.83131	3060.68	33.1242	426.074	8.33562	71.9783	1.7738	289.12	6.88631	31.2214	0.912994	169.9	4.69016	33.5718	0.95952	86.7142	2.36277	10.9002	0.498908	64.2763	2.74644	8.285	0.333071	4.06898	4.45927	63.4629	1.1294	9.78436	0.337727	70.8789	1.10913
X1Y2Z2	X1Y2Z2_009	14.8297	0.924747	120.449	3.229	56.4945	3.30988	1760.09	21.3639	1011.78	12.3364	2.15853	0.394557	2972.51	30.0667	7209.59	67.0472	865.349	9.16179	3219	36.4949	463.563	8.96715	77.035	1.97958	292.963	7.47331	34.0062	0.779661	180.878	4.85371	33.0567	0.894627	90.4563	2.60959	11.8994	0.416191	71.0192	3.02999	9.04417	0.372872	2.23262	4.10286	58.7335	1.17195	8.10592	0.265786	65.5458	1.13993
X1Y2Z2	X1Y2Z2_010	15.5798	0.982701	137.082	3.31779	57.9731	3.52681	1646.73	18.5431	902.206	9.31496	2.22188	0.395112	2640.9	35.3085	6650.68	69.3531	803.914	9.13162	3026.83	30.9165	425.014	8.33701	71.6328	1.88942	267.689	6.49016	31.5048	0.898952	171.509	4.23103	31.3204	0.914581	86.7278	2.25759	10.5383	0.537154	64.8097	2.75685	8.16883	0.357596	-4.78009	1.34066	64.0112	1.25828	10.729	0.321669	72.2605	1.11216
X1Y2Z2	X1Y2Z2_011	14.9274	0.824702	123.878	3.12614	57.0659	3.38701	1727.07	20.1634	948.165	12.5279	2.06621	0.350449	2803.2	33.6622	6903.8	66.8132	832.939	10.9589	3130.8	38.9144	438.524	8.83053	73.1484	1.84023	291.153	6.46496	32.929	0.967617	175.067	4.31685	32.1249	0.830662	85.0732	2.71566	11.792	0.555548	63.1731	3.00714	8.60439	0.35132	11.5452	5.13156	62.8237	1.28403	8.99836	0.296239	69.1454	1.1849
X1Y2Z2	X1Y2Z2_012	14.6372	0.833492	131.615	3.19289	56.4647	3.24682	1689.43	18.9825	909.255	10.6935	1.42107	0.267907	2692	32.1301	6661.62	68.443	799.963	8.7981	3026.67	36.0889	433.788	9.21222	70.5939	1.83894	278.133	7.22831	32.2417	0.959116	168.771	4.51126	31.6648	0.809799	87.235	2.49201	10.6802	0.427183	63.198	3.10786	8.25071	0.325705	9.76276	4.71963	60.9192	1.27298	9.37872	0.312225	68.9267	0.970826
X1Y2Z2	X1Y2Z2_013	14.2647	0.767003	125.887	3.14796	57.0156	3.45346	1720.97	19.0119	929.393	8.97794	1.44981	0.275303	2747.66	31.0199	6762.03	69.6138	809.692	9.60586	3059.3	38.4546	424.632	8.85783	70.7108	1.67446	277.275	7.55119	30.7964	0.821408	173.245	3.98398	31.5785	0.95836	86.8869	2.7706	10.8366	0.416176	61.9139	2.63413	8.39087	0.331214	10.2125	4.87409	58.0446	1.14127	8.21882	0.27811	64.0313	1.07194
X1Y2Z2	X1Y2Z2_014	13.7468	0.957905	122.331	2.95485	55.8876	3.87286	1755.72	18.4016	1007.28	11.3337	1.9716	0.378834	3005.85	27.8799	7318.08	83.1434	879.203	9.82148	3286.22	37.1456	465.773	8.79861	76.4131	1.83514	298.841	7.40779	34.5612	0.942333	184.327	4.08708	34.4967	0.982521	92.6753	2.70746	11.8874	0.529663	71.0717	2.83217	9.17389	0.318489	5.37611	4.46611	60.3054	1.09774	8.36304	0.270845	67.7311	0.943433
X1Y2Z2	X1Y2Z2_015	14.9565	0.912177	135.416	3.48203	55.2242	3.27838	1650.06	18.193	895.027	9.83428	2.04406	0.325744	2575.03	25.0148	6488.69	58.8834	791.594	8.13665	2981.08	33.927	424.975	8.78303	70.4983	1.84717	274.557	7.43587	31.1373	0.76758	169.08	4.74404	31.1221	0.946486	83.3155	2.62334	11.2699	0.483187	61.6559	2.80545	7.82944	0.311419	4.68368	4.66356	62.7386	1.24282	10.9213	0.322475	69.7577	1.02323
X1Y2Z2	X1Y2Z2_016	13.9505	0.794472	128.135	3.26816	57.0829	3.32605	1667.17	19.6022	904.12	9.74051	1.9341	0.371244	2611.97	26.0267	6592.4	68.8723	797.821	9.40429	3000.78	34.631	429.05	8.68105	68.3082	1.53116	272.657	6.72645	30.9795	0.88284	164.821	3.7182	31.6575	0.910749	84.6654	2.82202	10.9616	0.471121	61.8368	2.86992	8.31876	0.304424	1.17475	4.1733	63.7267	1.17409	10.911	0.356329	70.0757	1.08456
X1Y2Z2	X1Y2Z2_017	15.3266	0.934193	123.778	3.1153	57.6438	3.22681	1716.85	19.9928	926.775	10.2385	1.67354	0.304906	2793.88	26.55	6779.17	62.4253	813.146	8.16075	3031.6	36.002	426.507	7.60947	72.7022	1.97588	274.453	6.07894	32.0979	0.825071	171.296	4.16263	31.7427	1.01464	86.6121	2.34847	10.6132	0.485507	64.7083	2.57036	7.97554	0.349899	-2.65034	2.9955	58.3609	1.02536	8.27438	0.265901	65.1908	0.948004
X1Y2Z2	X1Y2Z2_018	14.5987	0.897687	114.912	2.61391	58.7866	3.25369	1780.15	19.69	1045.6	12.1357	1.93507	0.374718	3016.65	26.8084	7348.72	70.6312	885.993	10.4332	3291.63	32.0677	476.091	9.83002	78.3376	1.82806	304.691	6.69929	35.0867	0.860699	190.047	4.56534	35.4403	0.859164	94.7648	2.66813	12.0402	0.535372	70.6815	3.15179	9.47407	0.372435	-0.167234	3.82681	58.944	1.05426	7.72649	0.269832	64.4135	0.958574
X1Y2Z2	X1Y2Z2_019	14.9278	0.881468	138.669	3.39862	54.1479	2.88688	1635.98	18.2432	894.397	10.485	2.06525	0.363495	2620.28	26.5629	6551.77	60.421	792.167	8.10201	2979.34	35.6579	421.863	9.11711	68.7704	1.71499	272.255	7.14531	31.2479	0.778143	168.584	4.28187	30.3461	0.892938	82.6307	2.27388	10.3323	0.548972	61.9056	2.56962	7.71608	0.315945	2.34934	4.37015	62.4781	1.15364	10.627	0.320761	68.743	1.0795
X1Y2Z2	X1Y2Z2_020	14.3762	0.834503	123.584	2.99058	54.0468	3.11816	1729.96	17.7366	904.949	10.6272	2.11124	0.337793	2832.89	29.5404	6799.85	64.6136	803.57	8.05826	3027.8	32.8815	428.797	9.53325	71.0677	1.81128	277.276	5.91382	31.9302	0.918987	175.044	4.53774	31.668	0.885175	85.1685	2.55599	10.8531	0.542098	61.8011	2.67648	8.32401	0.276784	0.614069	3.8117	58.1885	1.06462	7.49282	0.283241	63.5273	0.994031
X1Y2Z2	X1Y2Z2_021	16.0631	3.18669	139.354	10.7738	59.2845	13.7747	1691.68	59.4503	927.596	52.5001	1.27001	0.941444	2437.14	119.15	5957.56	302.227	797.407	38.9737	2844.98	159.099	456.824	30.9241	70.4083	4.57648	279.467	19.1144	34.3818	2.71093	178.294	14.6953	32.5974	3.02266	84.8453	6.5848	10.7993	1.6267	62.5783	7.83989	7.71938	0.834819	-10.7875	0.476802	70.0708	3.04454	14.099	1.106	76.5102	3.31361
X1Y2Z2	X1Y2Z2_022	14.5846	2.56447	134.1	15.654	62.2639	12.631	1732.04	105.27	933.62	58.3872	1.33698	0.812789	2422.42	101.653	5959.01	367.027	793.54	44.1406	2893	160.509	435.138	27.5408	69.7475	6.0288	262.733	21.2075	31.7865	3.05692	163.893	11.9515	31.0815	2.79063	83.1629	7.73697	11.0657	1.46168	65.8433	6.31372	8.41055	0.990426	4.38727	15.9613	69.8871	4.18399	15.1429	0.833675	75.8033	3.40241
X1Y2Z2	X1Y2Z2_023	12.8017	2.2109	128.604	13.8311	60.7086	8.97118	1757.05	81.9774	1028.89	67.7396	2.65743	0.95452	2741.78	136.531	6332.71	289.922	845.341	43.0109	3297.97	157.021	470.007	34.8254	78.6996	5.64491	294.142	23.4179	30.9427	2.87152	192.299	17.7025	36.5611	4.03012	95.2983	8.34554	12.0451	1.49729	60.3617	7.70265	8.95481	0.896829	4.28614	11.8133	67.5407	3.63798	11.5011	0.919829	71.628	2.9548
X1Y2Z2	X1Y2Z2_024	14.611	3.03148	134.759	12.4275	64.1572	9.4043	1709.24	109.014	901.579	63.868	1.60958	0.75562	2491.99	175.072	6053.97	394.222	789.04	42.1619	2905.15	121.024	397.465	27.3875	71.0217	6.82757	284.819	22.48	33.0913	2.82889	170.159	17.1989	30.5852	2.45646	90.4697	9.96357	10.685	1.43321	57.0504	9.14313	8.24639	0.930456	6.43416	10.6843	69.8744	4.11216	14.0475	0.976489	75.9748	3.48006
X1Y2Z2	X1Y2Z2_025	12.2473	1.87991	120.501	13.4034	65.9927	11.5082	1750.59	90.7364	940.898	47.4154	1.40458	0.692502	2749.79	137.99	6381.3	343.52	806.411	45.0329	2982.18	138.383	421.169	32.6543	78.3064	6.57614	280.592	19.9001	32.4616	3.0032	184.794	13.3158	32.6863	3.1992	96.7531	6.46776	10.881	1.20883	62.2112	8.4513	8.198	0.818207	-0.998905	0.169866	64.8415	3.77019	11.3603	0.777032	70.3132	3.25438
X1Y2Z2	X1Y2Z2_026	12.575	2.19706	130.272	15.2301	69.793	12.2247	1723.23	91.5906	946.346	50.9775	1.55032	0.801819	2548.82	106.848	6537.57	411.519	780.302	42.6801	3067.2	157.852	426.32	35.928	66.5917	6.76803	281.911	27.0328	33.9487	3.28848	175.317	11.2397	32.8717	3.17237	95.2984	9.05092	11.6342	1.55047	69.8944	8.38661	8.81946	0.915981	37.4933	22.7181	65.4283	3.70853	12.6951	0.941072	75.5081	4.06211
X1Y2Z2	X1Y2Z2_027	12.0919	2.91475	156.485	14.1805	69.9742	11.1458	1690.17	117.495	922.625	55.1011	1.33112	0.898483	2473.36	122.478	5959.41	281.372	792.385	51.2671	3069.92	174.26	436.224	32.094	69.9602	5.12097	288.183	19.1974	31.5108	2.62879	173.834	16.034	31.4919	2.79648	87.8414	8.49654	12.63	1.64165	58.366	8.00762	7.94235	0.866971	39.8102	28.3188	69.2219	3.65201	14.5108	1.06843	76.7838	3.11007
X1Y2Z2	X1Y2Z2_028	13.8268	3.71595	138.675	15.3047	65.9075	10.7763	1696.84	101.779	939.06	65.9772	0.872327	0.586176	2576.36	127.175	6402.53	413.442	816.161	52.2119	3111.58	187.332	427.925	32.2936	68.4058	6.55085	283.202	25.5394	35.7852	4.05577	184.016	15.9164	32.3132	3.13545	93.5355	8.41512	11.5818	1.78996	61.9902	9.62247	8.35364	0.85206	-0.921208	8.5217	66.1325	4.96597	10.8961	0.884133	71.5001	3.24039
X2Y1Z1	X2Y1Z1_001	15.3205	1.05007	133.97	3.54889	58.3524	4.21204	1708.84	24.7979	911.377	12.3192	1.72208	0.343133	2646.79	36.8108	7070.09	86.5542	829.565	10.9511	3065.06	40.0915	440.334	12.4322	71.7535	2.14333	288.033	8.15018	31.6906	0.988262	171.073	5.17155	32.8687	1.13968	85.4842	3.01586	11.3779	0.589567	67.9649	3.08278	8.22308	0.409789	6.19176	6.30367	64.7112	1.50262	9.83658	0.396478	71.7365	1.34288
X2Y1Z1	X2Y1Z1_002	14.6463	1.11503	136.964	3.34293	58.1944	4.09854	1704.41	26.0681	912.744	13.8046	1.79226	0.380832	2643.39	40.1741	6998.19	87.5875	823.37	11.6523	3115.2	51.8172	442.094	10.2393	72.9442	2.06301	282.675	8.17396	32.5875	1.13839	173.823	5.62844	32.4643	1.06685	87.4554	2.78002	10.839	0.595581	66.5083	3.14194	8.04961	0.346714	2.29605	5.45107	65.2345	1.57963	9.86565	0.326364	71.8566	1.26772
X2Y1Z1	X2Y1Z1_003	15.8956	1.04114	136.006	3.95476	56.0307	4.15148	1696.43	25.5272	907.674	15.4646	1.70994	0.35252	2677.32	42.2	6997.09	96.5767	832.623	12.1772	3092.13	51.7223	439.232	10.6769	75.8204	2.11885	284.762	7.82397	32.5712	0.929809	170.626	5.75464	31.4682	1.00017	86.9465	2.84942	11.3747	0.587025	64.1924	3.21208	8.36358	0.390494	5.20734	5.98466	64.7602	1.19329	9.37151	0.32257	70.2532	1.27839
X2Y1Z1	X2Y1Z1_004	15.07	1.07948	133.435	3.84889	58.0137	3.78468	1746.49	22.9837	962.131	14.1712	2.06509	0.399156	2775.71	39.6547	7316.95	92.8941	862.161	12.6616	3173.78	47.1323	470.326	11.5364	75.127	2.43938	300.484	8.50237	33.1883	1.13883	178.316	4.88532	33.4035	1.03322	89.9636	2.39771	11.3198	0.553334	67.6735	2.91648	8.89171	0.397558	1.2976	5.42625	65.631	1.14639	9.15975	0.290453	73.5954	1.08647
X2Y1Z1	X2Y1Z1_005	15.1893	0.913924	133.297	3.4513	58.6162	3.93848	1723.64	23.268	918.55	13.3784	1.41987	0.330395	2678.5	40.1364	6941.57	88.4655	827.474	11.0591	3069.15	41.0163	446.514	10.7808	73.6228	2.08393	286.627	9.02429	32.6228	0.999448	166.18	5.16221	32.4589	1.09001	87.232	3.20785	10.8059	0.496439	66.3388	2.92852	8.17613	0.399876	1.98773	5.26998	63.022	1.26829	8.94393	0.283811	69.0326	1.23077
X2Y1Z1	X2Y1Z1_006	15.1853	0.8782	144.811	3.56534	57.194	3.77577	1643.81	23.572	905.951	11.8408	2.05241	0.389732	2576.87	36.3311	6819.82	86.9319	827.18	11.8186	3054.46	41.9819	437.358	11.2472	72.5635	2.13824	280.63	7.68687	33.3395	1.2199	172.477	5.26194	33.2011	0.935806	87.2968	3.15393	10.9375	0.505993	65.1692	2.89714	8.07518	0.334192	5.65002	5.58281	70.1386	1.28615	11.8901	0.374712	76.9503	1.17154
X2Y1Z1	X2Y1Z1_007	14.4092	0.962981	141.396	3.69716	58.1792	3.51503	1634.96	23.8429	910.39	12.2913	1.71871	0.334002	2605.54	32.9182	6864.73	76.1844	825.563	11.5811	3115.38	40.1588	442.296	9.22686	73.3902	2.11583	289.081	7.87334	32.5318	0.919741	168.397	4.34437	31.8544	0.957553	85.7365	2.83298	10.5601	0.503003	65.0534	3.20361	8.28256	0.325894	15.1597	7.32432	68.728	1.27113	11.7219	0.387414	76.3933	1.0989
X2Y1Z1	X2Y1Z1_008	15.2048	0.867361	122.13	3.81322	60.0563	3.98486	1762.19	24.7877	999.771	12.5852	1.77802	0.32059	3130.65	39.4084	7751.39	91.8169	899.453	11.7881	3326.17	47.1585	474.589	10.8389	79.1646	2.01406	309.281	7.72616	35.579	1.09613	185.786	4.51483	33.8174	0.984275	92.6466	2.7972	12.0057	0.552078	71.7902	3.20259	9.21328	0.410636	5.94174	5.39417	62.9417	1.33757	7.0834	0.286883	66.5514	0.950227
X2Y1Z1	X2Y1Z1_009	14.539	1.03112	143.3	3.6584	57.0099	3.75545	1657.02	23.491	909.709	12.3154	1.72239	0.32608	2620.37	31.2328	6793.24	72.7885	826.561	9.63057	3058.95	39.7076	447.177	9.81249	72.6341	2.22108	280.421	7.88785	32.8116	0.966478	177.405	4.89353	32.7082	1.03997	87.8358	3.01684	11.2871	0.612812	63.9983	3.1794	8.41422	0.351251	5.56241	5.07681	67.3034	1.09701	10.8864	0.361258	74.078	1.18121
X2Y1Z1	X2Y1Z1_010	14.9828	0.897533	141.401	3.22216	54.437	3.37075	1610.48	21.5954	887.525	12.1283	1.87498	0.407151	2572.82	31.5268	6725.17	80.3357	807.3	10.5802	3033.2	43.5977	432.877	9.40117	73.286	2.21506	284.48	8.06707	32.5692	0.893138	167.063	4.8548	31.4436	0.90498	85.6565	2.54942	10.8579	0.604475	63.268	3.18409	8.11973	0.310421	7.88013	5.35858	69.5512	1.28013	12.7988	0.343987	77.0306	1.27412
X2Y1Z1	X2Y1Z1_011	14.687	0.917505	142.601	4.23324	52.9811	3.12986	1625.57	21.4432	881.295	9.58327	1.77599	0.342399	2484.3	23.6319	6638.37	75.1855	789.944	8.54659	2986.45	37.8422	427.882	9.90679	72.3202	1.74419	276.197	7.65364	30.2684	0.841665	165.987	4.72874	30.5771	0.927527	82.9913	3.14363	9.9795	0.481525	59.1668	3.05216	7.58292	0.279694	1.55185	4.10619	59.5534	1.24653	10.2248	0.303859	65.2598	0.883613
X2Y1Z1	X2Y1Z1_012	15.3189	1.07153	124.652	3.31238	52.4804	3.66466	1730.03	22.5877	945.556	12.2075	2.18419	0.408875	2798.03	34.347	7051.09	73.0483	837.863	10.9524	3105.62	37.65	445.875	9.65297	74.2649	2.14382	288.253	6.36884	32.6391	0.899052	179.195	4.95258	32.5252	1.14278	84.0385	2.80208	11.4985	0.560562	64.6829	3.22623	8.86596	0.415803	1.48471	4.28352	60.6453	1.34561	8.35957	0.275979	67.1769	1.29579
X2Y1Z1	X2Y1Z1_013	14.6945	0.968663	131.713	3.29937	57.6493	3.57875	1714.66	23.11	919.132	12.3845	1.83506	0.362092	2686.57	32.6422	6847.62	77.0369	817.704	10.1361	3097.53	43.0449	435.737	10.3761	71.1581	1.92708	285.821	6.67247	33.3284	0.979344	172.471	5.48561	31.6101	0.891432	85.7747	2.83225	10.9838	0.569656	63.0432	2.74567	7.89557	0.321994	4.8361	5.00868	59.7587	1.20699	8.15077	0.279286	66.5557	1.144
X2Y1Z1	X2Y1Z1_014	14.6698	0.896365	132.478	3.07428	57.3197	3.21814	1722.07	18.4701	934.094	12.8258	1.83904	0.366478	2731.55	31.2444	6911.4	69.55	826.842	9.99992	3080.5	35.9804	448.095	10.0206	72.8184	1.83721	282.587	7.16884	32.8843	0.967317	175.458	3.99104	31.2249	0.960723	88.4012	2.84816	11.4255	0.554485	63.9813	2.98205	8.09299	0.326712	2.82974	4.63471	60.2744	1.16667	8.76128	0.290757	67.2898	0.966953
X2Y1Z1	X2Y1Z1_015	15.337	1.05871	132.386	3.23913	57.3375	3.51993	1718.83	18.6326	947.371	11.7442	1.97759	0.372646	2788.65	32.6169	7026.83	68.4548	831.804	10.546	3172.89	37.8969	445.084	8.89866	76.6154	1.99512	294.077	8.75725	33.0763	0.955931	177.498	4.57883	33.0562	1.00993	88.2702	2.81486	11.446	0.534054	69.378	2.68216	8.48596	0.362019	0.619058	4.1285	63.3598	1.14734	9.09376	0.305214	70.015	1.12559
X2Y1Z1	X2Y1Z1_016	14.8794	0.822776	140.998	3.58824	58.8497	3.34868	1658.39	19.1605	895.975	11.2109	1.82842	0.313608	2549.27	30.7011	6603.11	66.0952	791.907	9.4893	2980.68	34.6991	427.775	9.31267	72.1079	1.92612	279.19	7.15036	31.9744	0.896967	175.041	4.43461	31.2132	0.875569	85.3541	2.50563	11.0988	0.476486	62.577	2.87888	7.96081	0.320734	2.67131	4.62223	62.3021	1.23574	10.1447	0.36532	69.6018	1.06713
X2Y1Z1	X2Y1Z1_017	15.0779	0.868787	136.6	3.30606	59.219	3.61962	1686.81	22.0658	898.947	11.6198	2.01052	0.330472	2539.94	30.1419	6588.59	69.2685	786.533	10.2223	2973.12	42.3312	428.825	11.1915	71.8087	1.6674	279.162	7.28857	31.6981	0.786355	166.089	4.6398	31.186	0.91844	82.7515	2.56722	10.7252	0.465628	59.9924	2.54084	8.26672	0.300047	1.52931	4.21657	60.6308	1.20608	9.10475	0.319134	67.4963	0.967278
X2Y1Z1	X2Y1Z1_018	14.3934	0.830878	128.901	3.38057	57.1214	3.66531	1718.13	21.6867	948.093	11.3268	2.11816	0.391347	2787.77	33.7675	6970.27	84.8089	833.721	11.0839	3109.19	37.5123	451.474	10.2034	74.2066	1.93492	286.346	7.77711	32.1024	0.924618	172.809	4.32228	33.414	0.968749	88.5297	2.88858	11.143	0.501297	61.9584	2.72084	8.64422	0.357079	2.92103	4.33631	61.0146	1.27493	9.21322	0.326452	67.0323	1.09834
X2Y1Z1	X2Y1Z1_019	15.1174	0.896872	138.568	3.35475	59.5794	3.69137	1659.01	19.0661	903.244	11.061	1.73108	0.398537	2622.91	30.2325	6768.49	72.6644	801.735	10.3792	3045.9	39.5327	430.56	8.60332	71.7389	1.85743	283.904	7.64879	31.6527	0.957514	171.019	4.43154	31.7452	0.930647	85.0671	2.55499	10.8433	0.522104	64.3112	2.7871	8.3612	0.33517	5.24959	4.62832	64.0027	1.18001	10.7727	0.356863	70.5568	1.07381
X2Y1Z1	X2Y1Z1_020	15.7605	0.841161	120.822	2.94309	61.7095	2.82613	1776.78	19.8382	1080.37	13.0996	1.95535	0.355345	3130.55	34.6979	7805.61	84.2283	924.9	9.90026	3459.05	41.0262	483.917	9.42068	83.1984	2.42778	315.632	7.18995	36.709	1.05019	190.148	4.86839	36.4364	0.911541	98.4942	2.89066	12.667	0.508765	73.6222	2.84745	9.44007	0.332764	2.13335	2.90377	58.8416	1.15782	7.25702	0.246403	64.373	0.983481
X2Y1Z1	X2Y1Z1_021	16.3756	3.97768	117.319	14.8503	53.534	15.9992	1799.13	165.01	1057.42	96.0866	1.61756	0.88148	2866.6	208.267	6726.41	585.023	813.695	57.5914	3218.1	275.986	470.422	48.1163	81.6998	8.94254	297.761	30.2736	33.9964	3.64597	182.631	21.4388	37.1777	3.89508	91.2044	9.14841	13.3399	1.554	72.1004	8.7383	8.81191	0.903719	27.3806	22.0299	63.0073	3.40887	10.9757	0.972203	69.2791	4.08131
X2Y1Z1	X2Y1Z1_022	15.0675	3.53897	145.923	25.7076	80.219	17.8813	1647.57	147.877	953.773	99.889	1.14912	0.775281	2453.46	208.89	5836.76	468.721	807.837	89.7738	2968.65	216.823	441.062	38.9917	70.6191	7.80077	262.823	22.3865	32.3102	3.45331	187.187	24.7838	35.6328	3.96613	86.1691	10.2382	12.1748	1.83617	73.2469	13.1625	7.56719	1.16675	52.2647	29.6998	71.2442	6.11215	14.4336	1.23728	78.78	5.27954
X2Y1Z1	X2Y1Z1_023	13.8782	2.8293	133.939	11.8783	56.5498	15.2459	1579.01	95.6352	934.753	48.7043	2.43696	1.15689	2457.61	129.56	5797.46	355.674	743.373	34.6012	2769.62	153.146	443.304	31.2311	72.2968	6.94087	273.661	22.8518	32.2093	3.4063	184.603	23.0802	32.0164	3.10521	86.0244	7.9908	10.2168	1.58313	62.942	8.81638	8.73796	1.09252	4.2615	16.6763	73.1771	4.20713	15.4043	0.938723	75.7856	4.06257
X2Y1Z1	X2Y1Z1_024	14.8688	2.52454	119.209	12.718	65.5304	9.17552	1576.82	56.2755	911.159	34.5951	1.46691	0.986301	2423.42	109.822	5689.08	196.914	737.733	30.3464	2885.25	110.815	450.809	23.452	70.6891	5.34339	263.688	21.4987	30.8425	2.54628	170.084	10.9652	33.0851	2.62821	87.9167	8.32526	11.4019	1.37406	63.6957	7.74152	7.72797	1.01967	17.6038	21.1147	70.0669	2.83253	14.4128	1.2846	74.2288	3.4746
X2Y1Z1	X2Y1Z1_025	14.7289	2.8809	126.719	12.9889	62.169	13.7988	1657.03	82.6227	883.373	29.7022	1.5732	0.87002	2413.32	132.35	5799.54	271.652	753.342	40.9367	2842.41	144.033	445.143	20.7885	73.7883	6.26813	278.763	25.9646	32.6106	3.2894	177.911	13.2796	35.117	4.13293	85.4877	7.31835	11.8552	1.50239	64.6487	7.21837	8.69119	0.767179	39.8998	35.1048	70.7978	3.77992	15.8258	1.09928	79.6189	3.65476
X2Y1Z1	X2Y1Z1_026	15.2187	3.11827	130.136	12.7002	67.914	13.0897	1656.92	60.8385	924.796	38.7023	1.74196	0.85526	2600.89	103.591	6001.41	254.994	802.26	27.466	2953.53	130.525	448.16	31.7639	72.6978	5.34987	279.386	23.4134	31.4476	2.90008	163.501	14.5115	32.9654	2.80183	96.9822	7.71439	10.0189	1.15219	71.2697	7.09453	8.08093	0.749356	3.8397	15.0552	65.1927	2.86658	11.217	0.809155	69.2225	2.76441
X2Y1Z1	X2Y1Z1_027	14.3644	2.44233	130.142	18.0471	68.4817	13.7396	1627.24	110.93	944.131	70.2877	1.5198	0.801973	2325.48	132.692	5796.59	325.861	777.044	51.1747	2924.13	246.152	417.813	45.2075	74.5193	7.93416	271.086	23.1251	30.1945	3.27507	169.799	15.151	34.3529	3.99415	85.8566	9.03357	9.84082	1.38814	59.0742	8.12433	8.64705	1.0307	4.96966	17.0385	70.0383	4.86476	14.7735	1.08547	75.9606	4.56639
X2Y1Z1	X2Y1Z1_028	16.0696	3.27801	122.652	15.1797	61.9421	9.00231	1777.61	62.6975	940.398	48.7597	2.48879	0.940496	2608.63	108.358	6044.79	236.594	806.921	32.8997	2916.25	133.306	429.637	27.3288	68.7629	5.42323	271.33	18.8096	32.4377	2.16915	184.125	10.5242	32.2566	2.98752	85.6817	7.56526	11.2506	1.38264	60.5314	8.15763	8.86918	0.853201	10.4521	15.8359	64.6886	3.55675	11.6373	0.97316	70.4886	2.91878
X2Y2Z2	X2Y2Z2_001	14.5272	0.851083	138.886	3.26529	53.6507	3.12376	1616.26	18.149	898.844	10.2187	1.78087	0.352158	2644.13	28.2315	6635.14	72.3793	802.49	8.94419	3010.47	33.0085	432.778	7.64888	73.4001	1.71231	280.039	6.73922	31.5596	0.841267	169.721	3.91329	32.1892	0.836004	86.1885	2.66647	10.8511	0.512979	63.553	2.5455	8.03409	0.309617	8.87137	4.64629	67.7894	1.34344	12.5994	0.332766	74.1657	0.958003
X2Y2Z2	X2Y2Z2_002	14.3571	0.925399	135.042	3.50803	57.9008	3.22151	1614.87	18.7226	885.156	11.4284	1.95583	0.258632	2627.92	28.7351	6524.52	68.3359	789.347	10.337	2968.96	37.909	424.173	8.56718	69.617	1.76011	272.466	6.27742	31.5022	0.907776	167.32	4.8648	31.2344	0.87636	84.4222	2.5464	10.3768	0.537351	62.6679	2.79666	8.09868	0.316418	8.01773	4.87184	68.0862	1.2163	12.3071	0.361452	73.3972	1.18804
X2Y2Z2	X2Y2Z2_003	14.2179	0.872232	137.402	3.24995	56.9244	3.48116	1620.01	19.8368	892.698	10.7378	1.71182	0.321282	2572.73	26.9121	6451.54	51.1123	783.044	8.05992	2978.27	33.0968	416.286	9.24876	70.2415	1.91848	272.933	6.99789	31.2383	0.876383	167.431	4.16928	30.6361	0.874567	85.3268	2.4693	10.3489	0.452613	61.0032	2.25548	8.08293	0.333391	5.8621	4.63229	62.7429	1.27496	11.1655	0.305333	69.2162	1.0117
X2Y2Z2	X2Y2Z2_004	14.3066	0.951688	140.352	2.81356	55.5049	3.4792	1624.12	19.1769	890.498	11.4332	1.87627	0.322835	2597.66	30.2217	6530.14	58.2516	785.567	8.9711	2976.96	33.477	424.164	9.39651	68.1097	1.84943	273.311	6.43673	31.6879	0.892183	167.52	4.30683	31.04	0.908545	84.2936	2.41029	10.8337	0.518293	61.2978	3.00659	7.81154	0.361637	12.7945	5.69778	65.0414	1.22493	11.935	0.365322	72.264	1.17296
X2Y2Z2	X2Y2Z2_005	14.1746	0.852607	130.891	3.4929	59.2845	3.43431	1687.73	19.5334	914.59	11.0628	1.82485	0.304677	2706.15	28.7178	6803.53	72.0887	807.57	8.93566	3066.32	39.803	441.212	10.4345	70.8066	2.02753	279.19	6.97253	31.4643	0.971917	173.443	4.45178	31.6079	0.970998	85.2792	2.76772	11.0282	0.558566	66.0296	2.94074	8.16035	0.367114	8.58875	4.75387	63.8801	1.20034	10.3195	0.346179	70.1829	1.13909
X2Y2Z2	X2Y2Z2_006	14.7947	0.880338	139.648	3.09949	57.6859	2.89478	1665.78	17.6104	907.159	10.8208	1.76434	0.318108	2648.09	28.17	6602.87	67.5637	790.822	7.74348	3003.76	35.5073	429.242	9.18436	70.8367	1.63008	279.256	7.14762	31.0184	0.904737	170.81	4.74037	31.73	0.968586	86.4198	2.62393	10.4672	0.484238	63.4812	2.60706	7.98676	0.327464	3.44104	2.73765	65.8247	1.25722	11.3276	0.311715	71.3779	1.05466
X2Y2Z2	X2Y2Z2_007	15.1191	0.928504	137.202	3.48418	57.0002	3.381	1628.55	17.868	891.924	10.499	1.47338	0.3118	2625.57	28.7157	6591.79	64.7236	791.786	7.69337	2992.43	32.6155	429.078	8.45645	70.5322	1.65597	279.105	6.04063	31.4944	0.869137	169.061	3.90971	31.5751	0.90397	86.295	2.4778	10.458	0.491647	63.837	2.30209	8.03515	0.269166	14.9465	5.66579	64.7518	1.0436	10.6447	0.296877	71.3598	1.02805
X2Y2Z2	X2Y2Z2_008	15.4588	0.788232	136.163	3.93468	53.8707	3.16516	1651.77	19.8166	901.765	10.5211	1.80996	0.324639	2646.59	31.6184	6698.02	75.3252	800.217	8.492	3024.58	37.3655	428.223	10.1454	71.1309	2.19203	276.234	6.88241	31.4297	0.896967	170.873	4.14255	32.8813	0.956949	84.9189	2.70833	10.7325	0.506827	63.2194	2.92296	7.88649	0.333473	7.61821	4.35251	63.8523	1.29051	10.3802	0.344269	70.267	1.18175
X2Y2Z2	X2Y2Z2_009	14.7309	0.874912	136.996	3.29111	53.7389	2.45479	1633.7	18.0597	882.392	10.8843	1.87714	0.377161	2563.88	26.8394	6478.45	56.3261	780.454	9.25978	2982.16	34.9161	416.267	8.42819	70.0665	1.81515	268.138	6.74734	30.3137	0.819611	167.361	4.31886	30.6085	0.889714	81.6352	2.71777	10.692	0.497908	64.0387	2.56837	7.83188	0.306899	6.95733	4.53507	62.6999	1.2228	10.6405	0.376234	68.4587	1.00555
X2Y2Z2	X2Y2Z2_010	14.4692	0.940307	139.746	3.12569	56.7901	3.3037	1632.12	18.7599	886.722	11.258	1.62112	0.319193	2601.11	27.2303	6545.16	57.643	780.366	9.1017	2963.58	33.4546	410.473	10.1608	70.4324	1.75538	276.898	7.43134	30.7138	0.928387	167.136	4.465	31.9911	0.955838	83.0502	2.50825	10.499	0.499616	63.0633	2.73031	8.15413	0.305454	5.38852	4.53973	63.3805	1.36311	10.7773	0.361602	69.3955	0.916658
X2Y2Z2	X2Y2Z2_011	14.7468	0.917429	137.632	3.04632	53.3226	3.24912	1633.61	18.6134	888.917	11.2973	1.66088	0.319809	2623.61	27.5208	6678.02	67.5737	798.543	8.99925	2996.56	34.9047	420.913	9.71733	70.8607	1.81901	278.106	7.02983	32.0954	0.925743	170.29	4.66818	31.5938	0.940595	84.8267	2.54634	10.5147	0.580264	62.4703	2.85299	7.98657	0.307848	5.99685	4.47317	66.8028	1.34066	11.8377	0.364151	73.5309	1.10877
X2Y2Z2	X2Y2Z2_012	15.3453	0.922354	136.406	3.31594	53.7888	3.30131	1638.64	18.6276	882.166	10.2243	1.89496	0.307656	2604.64	30.2375	6619.56	70.1451	793.253	6.97163	3020.06	38.5168	421.527	9.27622	71.1179	1.43127	270.675	5.99151	30.4163	0.753778	173.442	4.47651	31.9154	0.941829	82.5756	2.59121	10.7165	0.548196	63.2911	2.49965	7.98386	0.310139	6.58865	4.33949	63.4793	1.1139	11.0217	0.311052	70.3749	1.21983
X2Y2Z2	X2Y2Z2_013	14.5702	0.916395	139.145	3.32857	56.6714	3.41775	1631.75	19.2276	887.976	10.8878	1.95703	0.328577	2628.6	27.4598	6621.71	63.6676	797.404	8.65094	3011.07	37.9326	429.018	8.0607	70.6056	1.71736	274.296	7.58123	31.0391	0.980543	167.864	4.43539	31.3363	0.91124	85.0837	2.30969	11.2861	0.499984	63.7259	3.07769	8.19606	0.310853	11.2912	5.07404	65.2244	1.25609	11.113	0.341167	71.8737	1.10686
X2Y2Z2	X2Y2Z2_014	14.1858	0.842085	137.318	3.21939	56.6322	2.97468	1624.79	16.8685	866.496	9.86976	1.95094	0.346674	2567.37	26.3772	6537.09	66.5635	781.781	9.12748	2995.47	35.7536	425.837	9.05148	69.367	1.81771	274.823	7.11597	30.5453	0.769779	166.772	4.20724	31.2447	0.693031	82.2061	2.39446	10.6523	0.489356	61.0788	2.50199	7.85914	0.337856	5.85582	3.80736	64.9623	1.3392	10.8764	0.286161	70.3443	1.11273
X2Y2Z2	X2Y2Z2_015	14.2549	0.789982	136.305	3.07884	52.3514	3.39459	1637.73	17.9077	885.222	10.7575	1.97255	0.315652	2567.63	25.2379	6515.42	62.1213	782.446	7.64554	2965.37	35.8379	420.237	7.91134	69.5605	1.6863	273.537	6.21576	30.5064	0.898117	167.021	4.32003	31.4629	0.953182	82.7467	2.48826	10.4292	0.515482	61.1267	2.509	7.8181	0.309895	11.8986	5.51171	60.5907	1.18316	10.3453	0.363018	65.8184	1.09652
X2Y2Z2	X2Y2Z2_016	14.3486	0.910769	136.338	3.27785	55.4898	3.28645	1612.34	20.5264	866	9.73859	2.23583	0.382655	2559.1	25.0165	6478.09	61.3771	778.599	8.75219	2949.22	39.6069	409.19	8.27006	68.9672	1.99284	270.405	6.74873	30.1206	0.805979	165.759	4.69467	30.2617	0.812661	82.009	2.66299	10.271	0.511517	59.6025	2.54792	8.0412	0.34523	9.86937	4.90031	65.3315	1.1004	11.73	0.335021	71.0742	1.06885
X2Y2Z2	X2Y2Z2_017	14.391	0.875332	141.327	3.38814	53.6995	2.91126	1620.16	17.5998	872.255	10.8492	1.53692	0.31153	2577.11	27.4473	6547.72	72.4016	782.332	8.9222	2948.63	33.432	413.374	8.2609	70.4433	1.67502	273.156	7.32212	31.2154	0.774161	167.547	3.67217	30.6724	0.928099	84.0562	2.3898	10.142	0.51088	63.8014	2.39656	7.90977	0.306407	5.91541	3.88138	66.2017	1.12782	11.629	0.351058	71.589	1.13591
X2Y2Z2	X2Y2Z2_018	14.4564	0.869468	137.561	3.37737	55.9875	3.32653	1645.05	17.9206	872.884	8.97929	1.64295	0.301033	2584.43	28.8446	6560.86	57.5308	783.275	7.65928	2970.73	31.8483	423.541	8.66815	70.6229	1.92535	278.899	6.47355	31.5986	0.902643	168.943	4.35378	31.5871	0.979172	83.1105	2.57023	10.2804	0.43584	60.7438	2.4912	7.96528	0.32579	9.37006	4.95969	64.7929	1.21451	10.6692	0.3531	71.316	1.14489
X2Y2Z2	X2Y2Z2_019	13.9389	0.934932	136.445	3.44858	57.1834	3.39101	1654.56	17.2251	861.505	8.93643	1.50762	0.279016	2576.3	32.7524	6494.73	70.2879	777.223	7.78552	2956.15	37.1825	420.952	7.91163	71.1061	1.90267	273.849	6.8343	31.5638	0.922298	169.941	4.42274	31.5898	0.905625	81.5523	2.74961	10.4508	0.484163	61.0215	2.64646	8.06947	0.307088	10.8737	5.46913	62.7393	1.35661	10.0556	0.307308	67.7046	1.18645
X2Y2Z2	X2Y2Z2_020	14.4007	0.796414	138.369	3.21692	55.6216	3.53116	1625.41	17.9144	864.163	11.025	1.98432	0.345498	2509.17	28.3496	6436.98	69.7152	777.62	9.76536	2947.24	37.6803	417.882	9.32236	69.1146	2.11832	263.022	7.00055	30.4389	0.82105	170.213	4.74287	32.3554	0.890837	84.9328	2.57759	10.9681	0.478288	60.5916	2.57078	8.09832	0.307768	6.40462	4.66365	64.6241	1.23456	11.197	0.332018	71.4513	1.06748
X2Y2Z2	X2Y2Z2_021	15.0834	3.34255	156.295	21.7439	66.647	12.3179	1619.02	96.0121	890.413	59.169	1.63457	1.03408	2430.4	142.023	6175.7	410.403	773.081	45.7296	2968.22	136.717	443.561	32.3398	75.9296	6.561	295.654	25.9629	32.1353	2.50507	189.056	11.9642	32.5418	3.00612	88.9546	8.92	11.5829	1.41119	61.8969	7.60281	8.83567	1.12247	59.7138	27.3271	72.1406	3.61814	15.5075	1.03228	81.5773	3.254
X2Y2Z2	X2Y2Z2_022	15.6265	2.8371	138.345	12.629	71.1216	11.6929	1640.03	80.6307	911.036	53.6165	1.64188	0.790827	2514.04	140.491	5958.79	422.768	762.738	45.8822	2935.63	164.031	446.946	36.1705	69.9014	5.8887	273.639	22.2466	31.5639	3.47014	170.462	13.1451	30.9064	3.06198	92.3421	7.9474	12.4488	2.12996	67.6157	6.4723	8.69804	1.26688	13.0736	15.9284	74.757	3.71627	16.8449	1.26525	80.8786	3.86642
X2Y2Z2	X2Y2Z2_023	16.5821	3.2809	143.471	16.7803	60.5146	14.4456	1679.2	85.9564	886.042	56.5367	1.21578	0.763244	2505.61	173.132	5819.21	335.784	797.199	60.2874	3005.33	215.457	414.887	28.6862	68.084	5.78268	285.403	23.1636	33.3244	2.80387	173.424	15.2752	30.5473	2.25094	88.2345	8.30531	11.1716	1.18761	63.0364	7.47726	7.6073	0.991995	17.4529	19.3838	72.1894	3.8722	13.6629	1.10225	75.2108	3.21129
X2Y2Z2	X2Y2Z2_024	17.1638	3.71342	137.84	13.264	68.2947	14.6386	1611.41	120.892	935.787	64.7922	2.53459	1.21393	2417.64	178.13	5998.79	373.893	793.054	40.857	2961.96	180.11	413.297	31.4372	70.0796	6.1969	281.247	21.0268	31.5415	3.24814	159.941	11.8576	29.9777	3.31323	89.5407	8.89065	11.0388	1.55534	64.9242	9.74792	8.38925	0.985613	-5.66454	11.2868	71.3699	3.80389	15.5389	1.11841	81.4793	3.96429
X2Y2Z2	X2Y2Z2_025	13.2706	2.41435	123.602	11.5136	57.9223	11.8703	1599.94	82.0046	878.33	40.8268	1.2082	0.705853	2424.79	118.661	6038.5	271.165	801.834	29.5041	3019.48	147.403	432.183	27.1294	66.8407	4.88268	292.365	15.4934	33.3091	2.52339	167.794	12.6815	33.2313	3.12517	93.6235	7.05703	11.2125	1.63644	70.2496	8.59449	8.60597	0.914735	-4.15839	7.15893	71.2723	4.4993	14.7765	1.19016	76.161	3.05075
X2Y2Z2	X2Y2Z2_026	15.6228	2.89227	139.111	15.6944	64.3774	8.16979	1663.38	77.5032	896.989	58.0203	0.918936	0.615581	2390.33	120.287	5813.54	281.749	786.509	47.2068	2776.67	154.59	432.164	38.9465	74.5896	5.99619	286.138	22.7723	31.6589	3.05971	172.805	13.2895	28.393	2.72235	90.6884	9.15027	11.8993	1.81141	63.6147	9.22052	9.36085	1.14447	2.92851	15.3168	68.4724	3.80385	14.1597	1.11375	78.0997	2.97597
X2Y2Z2	X2Y2Z2_027	11.9471	2.8313	152.411	17.6284	61.4784	11.5614	1587.36	95.219	884.665	42.7466	1.46768	0.922044	2360.27	132.494	5686.88	310.191	802.703	54.4896	2833.47	181.42	397.184	25.5526	69.4453	5.04764	297.43	28.2976	31.8416	3.09239	174.893	11.4756	30.0502	2.3499	80.4424	7.10083	12.2045	1.76784	67.8954	7.75987	7.88537	1.14584	4.33732	17.3503	69.2774	3.60862	16.2743	1.16657	79.4886	4.39224
X2Y2Z2	X2Y2Z2_028	16.1149	2.89723	151.417	12.9529	62.2893	11.5014	1743.35	74.3763	941.119	35.7777	1.5469	0.740268	2438.31	100.864	6147.05	285.636	769.239	29.5312	3051.98	113.431	428.764	25.3484	68.846	5.02618	284.808	21.0938	32.5706	2.01473	173.531	12.5637	30.4617	2.31194	85.5533	6.41136	11.5993	1.37123	58.2516	5.50907	9.09263	0.707836	-9.54376	7.48143	70.8294	2.84334	14.7342	0.913532	76.2849	3.04779
X3Y1Z1	X3Y1Z1_001	14.2329	0.890638	129.686	3.23566	56.7142	3.39473	1667.65	19.2883	923.017	11.031	1.72939	0.359473	2763.74	28.9518	6858.77	61.8696	816.997	9.3841	3055.89	33.635	427.042	8.60037	72.5783	1.88522	283.425	7.05903	33.6503	0.975434	171.176	4.35178	31.6596	0.969181	87.4074	2.47732	11.1503	0.520373	63.508	2.58806	8.32853	0.346978	8.58742	5.64021	64.6172	1.14622	10.2783	0.342881	70.9376	1.13668
X3Y1Z1	X3Y1Z1_002	14.9426	0.897251	125.866	3.26223	56.6085	3.52179	1681.01	19.273	996.487	11.5809	1.79983	0.33669	2888.84	31.5191	7158.06	69.8698	855.01	10.1368	3196.3	36.5966	453.125	9.41604	76.7241	1.78527	293.293	6.4856	34.5375	1.02136	177.941	4.43396	33.4679	0.997942	90.3226	2.80507	11.7641	0.471641	71.1025	3.12975	8.67634	0.323362	-2.0598	2.87504	63.7946	1.21912	9.90047	0.305192	71.0524	1.17632
X3Y1Z1	X3Y1Z1_003	15.0737	0.85787	132.113	3.27941	55.3868	2.85599	1634.5	20.1736	911.995	9.4765	1.70245	0.326172	2640.79	24.9866	6677.7	62.0537	802.544	8.32036	2999.2	34.2859	423.974	11.4091	71.1062	1.79942	279.331	6.9023	31.7823	1.13644	169.615	3.90032	31.4067	0.736705	87.4677	2.94656	11.0444	0.565639	62.1463	2.75648	8.33908	0.35012	9.40626	5.7399	66.9387	1.29668	11.8637	0.33418	73.3954	1.17357
X3Y1Z1	X3Y1Z1_004	15.0498	0.908327	137.169	3.39482	54.0656	3.57241	1625.72	19.1538	912.831	10.2355	2.2765	0.381669	2654.74	28.5407	6694.92	66.5481	806.062	10.4092	3004.03	39.4916	423.427	9.94716	70.8594	1.77816	280.816	7.40455	31.5912	0.936386	164.351	3.95535	31.1603	0.861573	87.4337	2.60145	11.0695	0.571469	64.2443	2.60475	8.15247	0.27575	7.47958	5.48498	68.1885	1.16828	12.4707	0.377917	74.3412	1.10995
X3Y1Z1	X3Y1Z1_005	14.0986	0.858241	138.715	3.16696	57.8831	3.26143	1622.68	17.5925	891.563	10.3676	1.91808	0.370611	2632.73	28.126	6598	63.5911	790.178	8.34688	2964.36	33.6024	412.32	9.52759	70.6779	1.82699	279.691	6.18773	31.5304	0.880861	168.253	4.65184	31.1303	0.928594	83.9035	2.29442	10.8479	0.485194	62.3944	2.98793	7.76492	0.303236	5.89348	4.97592	65.0623	1.24093	11.3529	0.352478	71.2055	1.0069
X3Y1Z1	X3Y1Z1_006	14.1651	0.856007	139.966	3.24881	54.1028	3.10927	1635.42	19.9594	930.895	10.9468	1.77678	0.325507	2706.58	32.6725	6799.25	67.2003	815.14	7.87292	3033.67	37.4744	435.027	8.60359	72.0802	2.27485	288.719	8.31498	33.2082	0.897127	169.498	4.8427	30.894	0.876818	88.1357	2.51485	11.2	0.531248	62.7227	2.74425	8.15989	0.313403	8.05126	5.28407	71.66	1.25726	12.8709	0.395788	77.2186	1.26348
X3Y1Z1	X3Y1Z1_007	14.8275	0.849534	133.987	3.19085	54.2505	3.32273	1641.86	22.7895	916.399	10.7347	1.70745	0.312512	2641.71	31.4525	6678.51	69.7698	802.576	9.67516	2981.79	39.4648	412.658	8.04738	71.5155	1.95939	281.98	7.11255	32.0747	1.03283	169.592	4.42846	31.2598	0.990412	85.5037	2.75946	11.2198	0.520653	64.268	2.68837	7.97645	0.315032	10.6819	5.6645	66.4807	1.14035	11.6013	0.32799	72.3141	1.07914
X3Y1Z1	X3Y1Z1_008	14.6004	0.702034	135.984	3.40829	53.0699	3.48936	1614.68	18.2403	917.63	10.9228	1.62251	0.280419	2698.22	30.2603	6726.21	70.5634	808.841	9.17411	3005.38	37.3623	428.801	8.88971	72.3913	1.6847	280.888	7.12257	32.3381	0.873765	171.87	4.59277	31.1767	0.953437	83.8424	2.44175	10.928	0.484258	62.738	2.38738	7.956	0.330705	10.1153	5.28829	69.7474	1.26784	12.3608	0.342963	76.0184	1.09226
X3Y1Z1	X3Y1Z1_009	14.3992	0.918367	140.115	3.02839	57.4734	2.85781	1594.59	16.1973	912.334	10.7969	2.05537	0.386794	2692.96	28.3135	6676.54	61.2401	808.883	10.1554	3002.67	33.2598	424.187	9.07465	71.3074	1.8762	281.399	6.23263	32.4655	0.877354	168.281	4.31472	30.8779	0.878069	86.7347	2.25069	10.6532	0.507149	61.9359	2.17135	8.22813	0.295282	8.99403	4.73274	71.3448	1.2155	13.3739	0.385049	77.1868	1.20086
X3Y1Z1	X3Y1Z1_010	14.4103	0.736506	131.469	3.01894	56.9726	3.09965	1635.24	19.4175	907.105	11.3524	2.04394	0.349376	2667.26	29.9925	6629.21	76.0644	795.042	9.58444	2979.5	35.9763	428.467	10.0307	70.1571	1.70529	274.766	5.96865	31.032	0.817647	161.103	4.36913	31.0124	0.798055	85.2616	2.64119	10.6759	0.476952	63.4817	2.35146	8.3034	0.326673	12.3176	5.19405	64.0023	1.19094	10.9091	0.351366	70.3648	1.11894
X3Y1Z1	X3Y1Z1_011	14.4651	0.817323	136.173	3.12526	56.1747	2.98587	1642.33	17.4121	908.083	10.2217	1.80735	0.315328	2666	32.758	6760.18	62.3701	805.448	8.20761	2989.12	31.1152	429.581	8.50287	71.2204	1.99805	279.234	7.20311	31.8872	0.770537	160.838	3.74122	30.5094	0.922078	87.7047	2.6712	10.6482	0.445937	64.8597	2.97738	8.04324	0.334681	4.44439	5.22682	68.0118	1.23989	12.0164	0.333652	73.6987	1.12841
X3Y1Z1	X3Y1Z1_012	14.5229	0.744558	143.782	3.2832	56.673	2.89342	1612.42	17.5786	910.555	11.0308	1.94556	0.313748	2700.78	29.9666	6778.12	60.8496	808.05	9.66224	2998.8	37.3901	433.811	9.40359	71.5117	1.71544	278.712	7.13285	32.02	0.877036	168.872	4.15923	31.9428	1.04347	87.3192	2.66558	11.0852	0.535031	63.3176	2.90678	8.07273	0.372453	1.14159	4.69771	70.876	1.32622	13.1011	0.354428	78.2119	1.2706
X3Y1Z1	X3Y1Z1_013	14.5219	0.810284	133.195	2.88906	56.2155	3.17152	1619.7	16.086	903.685	10.8165	1.83045	0.303627	2643.74	29.5823	6623.78	70.2491	795.744	9.27939	2959.91	34.2795	419.729	9.1234	70.5382	1.887	279.164	7.2927	31.6341	0.878352	164.297	4.68539	30.6144	0.903535	86.1581	2.56674	10.7104	0.467428	62.3549	2.6977	8.19114	0.348807	4.93956	5.32404	66.1896	1.36185	11.7516	0.368907	72.5638	1.25037
X3Y1Z1	X3Y1Z1_014	14.9247	0.891402	140.369	3.7399	58.1385	3.36505	1635.44	21.6295	925.08	9.46628	1.84315	0.347101	2723.66	29.9043	6802.88	73.7013	810.794	9.89481	3013.48	32.4408	431.564	9.47138	74.1254	1.74143	286.757	7.02184	32.443	0.94901	174.455	4.45105	31.4954	0.965513	87.7353	2.8893	10.655	0.490039	62.8057	2.47334	8.39977	0.30998	4.71491	5.08583	68.5109	1.22742	11.6945	0.371421	75.8123	1.04879
X3Y1Z1	X3Y1Z1_015	15.4299	0.849296	138.469	3.33189	56.5744	3.2603	1599.78	17.5858	915.409	11.8839	1.64481	0.281553	2673.26	32.7563	6729.74	69.3554	802.296	9.76505	2970.71	35.5369	427.147	10.0088	70.6978	1.7499	285.036	6.87324	32.0673	0.864944	171.729	4.42291	31.6332	0.951029	86.9295	2.78912	10.6711	0.476325	65.2804	2.97814	8.00328	0.364501	8.11424	5.40661	69.8942	1.21637	12.8574	0.354545	76.6147	1.20763
X3Y1Z1	X3Y1Z1_016	15.2489	0.885482	139.698	2.98269	55.7486	3.16131	1609.56	17.2958	908.256	11.0876	2.02883	0.371153	2681.98	24.7645	6713.6	74.1252	805.04	7.62236	2974.56	36.8966	425.467	9.0944	71.154	1.94379	282.078	7.27807	32.1269	0.897288	167.105	4.25477	31.2926	0.868926	86.1018	2.33023	10.876	0.6064	63.6813	2.42195	8.39635	0.300538	10.1081	5.4339	69.5361	1.29901	12.8725	0.390155	76.7525	1.22771
X3Y1Z1	X3Y1Z1_017	14.1078	0.886001	140.564	3.51111	56.1042	3.26345	1609.7	16.4463	900.318	10.5616	1.93938	0.322259	2661.65	29.1838	6582.57	69.2681	796.709	8.54718	2970.24	36.2774	418.656	8.52937	70.5837	1.71127	268.7	7.0205	31.1126	0.82452	165.902	4.11379	30.1939	0.883605	85.492	2.49769	10.7596	0.46464	64.0476	2.36583	7.95647	0.37592	9.98497	5.39624	68.3738	1.39043	12.8644	0.366345	74.8953	0.995595
X3Y1Z1	X3Y1Z1_018	14.813	0.788984	125.596	3.19847	57.081	2.99496	1740.78	19.3334	1005.4	10.3269	2.14348	0.393725	2986.41	30.2353	7363	75.3413	875.963	9.30764	3231.15	31.8461	453.904	9.86744	75.1712	1.96878	300.625	6.83859	33.5861	0.843237	174.643	3.9172	33.7958	0.832648	92.5792	2.59345	11.4494	0.5024	68.7939	2.77543	8.98231	0.327907	11.4232	5.35089	64.1635	1.31723	9.24696	0.30197	70.8842	1.02432
X3Y1Z1	X3Y1Z1_019	14.5127	0.82708	134.391	3.04741	56.4897	3.3228	1630.2	17.9595	899.425	11.7701	1.88172	0.372474	2687.64	28.3239	6705.22	61.0609	800.62	8.88522	2987.61	33.2933	432.298	8.65455	70.3197	1.43543	283.595	7.55552	32.0625	0.905656	169.138	4.26072	31.5948	0.879538	87.27	2.5448	10.5389	0.461145	64.2757	2.86949	7.99139	0.330581	7.59593	4.8079	65.7635	1.17716	11.073	0.34668	72.3175	0.931159
X3Y1Z1	X3Y1Z1_020	14.9202	0.902009	142.221	3.29738	54.3188	2.93793	1604.71	17.4835	898.836	8.76675	1.53309	0.313369	2619.17	25.2271	6558.46	59.1636	795.276	9.37078	2938.69	34.9884	418.078	9.14009	69.0407	1.92028	274.087	6.89307	31.2949	0.902719	165.686	4.42875	30.673	0.885626	84.819	2.5428	10.8112	0.473435	61.2122	2.57745	7.97159	0.342271	6.35555	4.81342	68.4118	1.34866	12.471	0.337642	73.8272	0.989879
X3Y1Z1	X3Y1Z1_021	14.0234	2.24549	142.692	11.9009	70.7157	12.1377	1689.18	66.1363	921.926	33.5047	2.08674	0.830097	2434.91	99.3612	6070.29	324.197	801.761	28.1025	3126.47	171.336	438.999	26.5133	70.9658	5.47936	271.83	15.222	34.1032	2.1425	157.725	10.9268	31.811	2.18224	92.8575	7.7748	11.8242	1.4608	68.8019	7.1078	9.12	1.0337	-18.0368	0.754111	79.2761	2.77881	17.439	1.06449	83.1976	2.84321
X3Y1Z1	X3Y1Z1_022	14.8874	2.30384	150.866	14.1365	56.5261	10.3868	1783.16	102.791	1003.15	44.7218	1.43549	0.708511	2597.7	127.664	6154.22	253.055	842.714	37.2255	2997.49	150.819	436.72	28.2261	74.2366	4.74894	289.474	24.6516	34.8379	2.76688	169.363	15.7201	34.8055	3.45965	99.3414	8.61961	10.9437	0.995708	62.3507	6.35768	8.67818	0.902365	0.5242	15.4713	79.3255	5.02165	17.1403	1.1799	83.5007	3.67644
X3Y1Z1	X3Y1Z1_023	14.1782	2.40812	159.979	13.4716	66.4177	9.30318	1727.88	66.5167	1014.86	41.5482	2.17487	0.918177	2750.68	112.083	6066.2	240.697	866.804	40.9181	3112.62	123.694	444.574	28.7661	74.0082	5.6384	293.389	19.6955	34.1378	2.82607	174.756	12.3148	34.631	2.27965	97.3619	6.62007	11.7193	1.44697	72.6378	9.43236	8.90329	0.767346	20.882	19.915	81.3894	3.35495	18.2032	1.11318	89.6312	3.06933
X3Y1Z1	X3Y1Z1_024	13.1164	2.73958	161.593	14.339	57.2937	7.455	1749.67	58.8298	976.652	34.3433	3.20593	1.28476	2631.15	113.035	5852.45	258.176	812.046	26.3571	2996.32	99.4338	446.696	22.879	71.6168	4.47329	282.842	24.0034	34.4176	3.15287	158.775	9.01425	33.8129	2.82008	92.3451	8.29917	11.1264	1.29054	69.6651	9.04712	8.76186	0.821938	-8.46165	0.250619	74.9453	2.56727	16.4662	0.841178	79.9352	2.47763
X3Y1Z1	X3Y1Z1_025	16.0031	2.22087	135.225	15.6504	53.9264	8.44137	1745.78	90.7946	976.773	59.2271	1.36003	0.712137	2644.65	130.556	5992.87	339.517	829.761	43.5047	2877.77	140.398	433.577	28.1117	70.376	4.94355	272.898	17.3415	33.2806	2.4497	169.501	10.8926	32.5389	3.36738	102.048	7.02337	10.549	1.25607	64.1629	6.08539	7.94807	0.912428	-0.698341	6.05595	77.5201	3.83892	16.0202	0.943768	82.6509	3.38559
X3Y1Z1	X3Y1Z1_026	13.6573	2.78189	142.573	13.6569	55.9396	8.29034	1771.88	115.646	964.348	53.4187	1.44179	1.11924	2577.83	123.134	5667.23	261.273	816.98	48.8997	2943.86	147.635	435.876	32.4046	69.8366	5.18177	291.265	24.6292	34.1548	3.04973	167.33	14.9656	31.5862	2.99811	95.9508	8.55326	11.5838	1.72396	55.8397	8.18858	8.76036	1.03755	0.517373	0.0370779	80.5714	3.42166	17.4921	1.06714	83.8272	2.68862
X3Y1Z1	X3Y1Z1_027	13.5456	2.16809	144.349	12.6656	67.4034	9.25819	1737.98	97.9893	953.963	48.0695	1.25487	0.634463	2660.74	96.2038	5958.64	250.792	803.038	24.1107	3061.92	151.422	448.983	26.7352	71.5991	5.71604	273.129	19.0328	33.3787	2.80819	169.314	10.6706	31.6724	2.12625	95.9992	8.0674	9.66496	1.60543	59.4081	8.48227	8.01038	0.78815	18.8707	14.5213	78.8061	2.42999	16.9236	1.00023	83.8226	2.52583
X3Y1Z1	X3Y1Z1_028	13.1826	2.81857	140.671	13.434	73.3277	13.8578	1759.13	67.6305	973.782	42.7379	1.15465	0.688713	2568.1	109.676	5873.03	222.921	791.795	30.7072	2925.69	135.809	440.287	29.1671	69.2116	6.52152	280.558	13.8701	33.5938	2.67092	163.98	9.64595	34.4216	2.13071	86.9099	8.19593	8.60671	1.28178	66.1316	6.26799	8.35225	1.09479	21.5226	16.5007	80.4917	4.07692	18.1611	1.01647	83.942	3.20764
X3Y2Z2	X3Y2Z2_001	14.2277	0.817142	125.912	3.65136	53.0808	3.60275	1725.99	19.1566	906.494	9.78506	1.92849	0.337748	2763.6	33.3486	6863.98	66.6303	807.859	9.59308	3067.29	35.6672	433.782	9.28108	72.137	1.70822	282.789	7.01978	31.7073	0.929634	166.79	4.52978	32.2967	0.985512	85.4372	2.16046	10.3815	0.459894	62.5242	2.29567	8.26891	0.317804	7.32124	5.05322	60.957	1.19745	8.41113	0.27774	67.3065	0.999265
X3Y2Z2	X3Y2Z2_002	15.2133	0.95095	142.827	3.61734	53.9035	3.27824	1598.73	19.2355	874.074	12.0445	1.99204	0.390463	2572.09	31.1342	6536.71	67.4056	785.876	9.45071	2984.55	38.8285	425.98	9.84617	69.1419	1.77696	278.299	7.4792	31.1511	0.888096	172.085	3.95269	31.8053	0.896967	84.3657	2.67683	10.6389	0.569316	64.1103	3.11296	7.98212	0.27994	8.13546	5.25583	69.0692	1.38213	12.8077	0.339174	75.2918	1.22805
X3Y2Z2	X3Y2Z2_003	14.5444	0.949083	142.009	3.56864	57.3092	3.2987	1642.14	19.3226	878.587	10.1807	1.75766	0.357025	2569.77	27.5411	6570.18	51.0473	779.875	8.06074	2940.53	35.6154	412.334	8.97937	68.7817	1.82256	275.429	7.78576	31.6324	0.871016	169.048	4.33389	30.1868	0.976756	84.8217	2.49614	11.016	0.496672	60.224	2.52276	8.03274	0.317931	3.56672	4.55157	65.497	1.18241	11.4849	0.36368	72.2279	1.09408
X3Y2Z2	X3Y2Z2_004	14.6488	0.886666	141.482	3.37125	57.8985	3.20551	1645.11	16.3287	893.307	10.5267	1.72755	0.351174	2649.8	30.5949	6640.69	69.9274	798.296	8.94913	3011.5	39.2181	424.984	9.05658	71.2006	1.74811	280.915	6.71953	32.1953	0.887886	174.522	4.38082	31.4753	0.77484	84.5008	2.34402	10.6887	0.458539	62.5034	2.37251	7.90613	0.294375	2.58604	4.49408	66.3683	1.3012	9.78151	0.351098	71.6599	1.1248
X3Y2Z2	X3Y2Z2_005	14.1602	0.779642	140.955	3.60452	54.1319	3.20554	1629.4	18.0651	876.034	9.54731	2.06275	0.330608	2586.05	30.4122	6597.28	61.7327	785.461	9.48284	2969.17	33.6046	422.674	8.96697	70.393	1.96148	275.467	6.58714	31.3148	0.848535	165.341	4.2944	32.1757	0.957514	84.5775	2.74767	11.046	0.495161	62.451	2.65922	8.09311	0.279702	2.78708	4.71255	68.4069	1.54116	12.2996	0.350214	75.1962	1.1471
X3Y2Z2	X3Y2Z2_006	14.6595	0.834766	140.467	2.9148	59.1066	2.96024	1624.87	17.057	884.467	11.2473	2.27553	0.389992	2577.41	26.0981	6548.78	66.8729	789.985	10.3128	2975.36	42.4083	422.42	8.52874	69.9202	1.91984	275.258	6.67639	30.7294	0.802076	171.304	3.95411	31.3217	1.02297	83.6776	2.38834	10.0448	0.488005	60.5088	2.78829	7.75227	0.281901	0.245922	3.98333	65.1749	1.37814	11.0257	0.324552	71.9116	1.22377
X3Y2Z2	X3Y2Z2_007	13.4424	0.814139	141.103	3.02509	56.5589	3.11583	1629.58	17.7639	880.823	10.176	2.0519	0.355464	2607.95	30.8878	6561.51	73.0746	794.161	7.94383	2983.37	38.3963	427.674	9.31521	72.2369	2.03754	280.634	7.54196	32.1479	0.953648	169.685	4.75935	30.4952	0.915175	84.3333	2.67747	11.1114	0.540576	62.5933	2.49075	7.78289	0.319797	4.43725	4.67686	68.132	1.30552	11.6712	0.35174	75.2356	1.24018
X3Y2Z2	X3Y2Z2_008	14.424	0.802929	139.821	3.31808	54.2131	2.95821	1605.63	19.6354	890.403	10.6402	2.01747	0.331474	2584.91	32.2135	6546.95	66.5288	787.761	8.26801	2956.82	35.5818	418.523	8.60563	68.8166	1.75145	277.569	6.43019	32.4413	0.808567	171.044	4.54539	32.0331	0.831067	84.2681	2.57637	10.3545	0.552857	63.8327	2.76883	8.236	0.282929	4.45705	4.15291	69.8585	1.30321	13.1486	0.378289	76.6424	1.23378
X3Y2Z2	X3Y2Z2_009	14.3907	0.996577	141.269	3.55055	56.6304	4.02033	1621.01	20.2678	884.344	13.0464	2.31609	0.347882	2562.83	32.9647	6570.22	76.8864	788.858	10.8315	2943.36	40.8307	421.032	9.28273	69.2978	1.8954	276.404	6.84658	31.5113	0.93703	169.622	3.88174	30.6069	0.837643	83.0964	2.55899	10.4628	0.502061	63.2061	2.93906	8.03549	0.322883	15.7178	6.14144	69.6474	1.45196	12.9876	0.46389	75.6393	1.34504
X3Y2Z2	X3Y2Z2_010	14.8681	0.867116	140.424	3.2311	54.7661	3.27983	1608.33	16.2572	886.169	10.125	1.62694	0.352615	2539.34	27.3854	6520.19	61.9949	787.229	7.9317	2919.08	34.5087	419.641	9.32686	70.8495	2.02966	273.446	6.40076	30.8702	0.89894	167.159	4.23185	30.6087	0.907278	84.1632	2.62197	10.7107	0.518921	61.5643	2.58472	8.09582	0.300564	8.31529	4.56296	67.246	1.33494	12.6406	0.341371	74.1469	1.25155
X3Y2Z2	X3Y2Z2_011	13.477	0.747411	140.119	3.35329	56.2484	2.87718	1631.64	18.3538	908.675	10.7734	1.566	0.324774	2643.84	29.7661	6662.14	64.6675	802.281	8.33404	3019.99	34.2956	427.684	7.77123	70.1182	1.87563	278.211	7.32137	32.6644	0.884384	171.895	3.88357	31.7072	0.924135	86.0372	2.80982	10.6135	0.480901	65.0053	2.89265	7.64647	0.276024	5.44476	5.279	69.9718	1.24374	12.5471	0.403411	76.2498	1.13413
X3Y2Z2	X3Y2Z2_012	14.2223	0.754271	140.613	3.38859	54.7838	3.32811	1608.9	20.9806	898.959	12.7318	1.84353	0.315374	2649.95	30.2828	6613.17	67.0978	800.894	8.6342	2969.64	37.696	421.949	9.31879	71.2841	1.9927	285.031	7.11801	31.6339	0.913894	168.111	3.9229	31.0271	0.848587	85.8088	2.68631	11.0982	0.549821	64.4464	3.00563	7.80426	0.291885	5.99493	5.15424	69.6836	1.14572	12.8375	0.380225	76.8139	1.13292
X3Y2Z2	X3Y2Z2_013	14.2927	0.966927	140.216	3.38958	57.8585	2.94268	1622.92	17.2227	903.289	9.37782	1.72559	0.318687	2615.18	31.715	6600.23	63.1613	795.928	9.41209	2996.1	35.3758	422.262	9.58523	70.3649	1.90717	278.372	6.97386	31.6741	0.908763	167.304	3.83672	31.3592	0.832394	85.1918	2.60632	10.9114	0.521299	61.0889	2.70702	8.00664	0.298492	3.22286	4.12661	67.264	1.50276	12.1408	0.364573	74.2161	1.23667
X3Y2Z2	X3Y2Z2_014	14.4952	0.845012	142.589	3.57759	57.5053	3.11067	1618.32	18.4883	902.591	11.1461	1.90075	0.282065	2598.51	29.4647	6553.63	70.9149	783.104	8.90871	2962.35	33.917	414.785	8.71346	69.677	1.88683	276.174	6.88658	32.2382	0.974934	162.723	4.48332	31.5706	0.887467	84.3097	2.31364	10.4584	0.457932	63.5983	2.47514	7.77685	0.323565	13.617	5.86919	68.3407	1.31733	13.1705	0.360927	74.173	1.35384
X3Y2Z2	X3Y2Z2_015	14.2431	0.885811	139.547	3.31591	56.5027	3.63961	1623.66	18.3294	903.985	10.4826	1.75882	0.338134	2609.58	28.1879	6571.88	63.0003	792.949	9.60582	2956.31	35.7825	417.674	8.07376	69.5832	1.57439	281.886	7.42083	31.9871	0.832834	166.962	4.16948	31.1342	0.845295	83.8234	2.37033	10.5682	0.539585	63.1175	2.76134	7.90184	0.316273	8.59408	4.46389	64.9056	1.22604	11.1871	0.317855	70.8448	1.27525
X3Y2Z2	X3Y2Z2_016	14.7466	0.743398	142.257	2.99115	55.0569	3.62415	1623.73	17.893	895.355	9.54858	2.39597	0.373186	2639.27	31.0104	6600.7	67.818	790.551	8.36035	2942.43	34.3311	418.512	8.31899	69.949	1.65607	277.832	6.5301	31.1089	0.903052	166.91	4.22217	31.2359	0.750197	84.6577	2.62356	11.0462	0.53794	62.275	2.66599	8.09447	0.333342	9.15268	5.02416	67.2911	1.12952	12.2692	0.317408	74.0212	1.13388
X3Y2Z2	X3Y2Z2_017	14.5493	0.941057	140.126	3.51073	54.7938	3.83183	1604.18	19.7033	902.075	12.9073	2.06439	0.377511	2626.26	29.6318	6525.19	65.1505	797.688	9.48897	2969.25	37.6336	423.49	8.9163	70.6953	1.86246	283.138	7.32856	32.3993	0.90221	165.4	5.04905	31.3849	1.03309	84.5678	2.50215	10.7987	0.56323	64.5642	2.915	8.01893	0.339846	8.98198	5.31681	68.3462	1.26688	12.665	0.322859	75.7184	1.34071
X3Y2Z2	X3Y2Z2_018	14.7234	0.872801	142.832	3.62766	51.8228	2.7379	1626.73	17.2691	907.441	10.201	1.85608	0.373262	2656.11	27.3065	6576.09	53.4884	792.447	8.45982	2990.1	28.5448	416.351	8.41075	70.6719	1.84223	284.508	6.6426	32.4497	0.928667	167.71	3.99982	30.8641	0.964296	87.3961	2.448	10.7488	0.463839	62.248	2.32486	8.03271	0.327113	4.22067	4.78525	69.7207	1.3048	12.8521	0.371464	77.2038	1.1256
X3Y2Z2	X3Y2Z2_019	13.7429	0.931361	141.665	3.08398	57.3854	3.34424	1613.83	19.6663	909.111	9.63601	2.04483	0.408228	2624.83	29.1763	6600.57	58.9858	797.516	8.97993	2986.25	36.3321	413.436	9.28085	69.129	1.69269	276.912	7.19546	31.6997	0.863532	168.734	3.36707	30.6636	0.808895	85.7002	2.51022	10.7868	0.504576	64.0575	2.56745	8.19272	0.348576	3.13002	5.21171	68.4552	1.38007	11.8286	0.36229	74.9315	1.28248
X3Y2Z2	X3Y2Z2_020	14.4536	0.92415	144.974	3.6525	51.236	2.8404	1615.12	18.9699	894.535	10.5038	2.11192	0.431751	2607.78	32.4621	6527.23	63.7677	799.897	10.3337	2959.62	37.0704	414.133	9.45179	68.8059	1.61635	277.801	7.34737	31.0984	0.988728	167.12	4.16424	30.9531	0.936658	84.7197	2.61887	10.7856	0.500983	61.554	2.87629	8.15608	0.32398	3.1232	4.96359	69.0401	1.2252	13.2772	0.388832	76.7469	1.17693
X3Y2Z2	X3Y2Z2_021	15.9516	2.63898	140.702	13.6796	53.9148	8.80833	1652.93	116.997	865.374	53.4062	1.14811	0.750988	2341.15	126.022	5775.27	311.815	768.608	41.132	2849.04	122.813	393.243	33.3995	66.3179	5.18468	278.128	23.8407	35.6497	3.68589	177.933	12.4745	31.5068	3.08776	86.1482	8.17107	10.5311	1.47661	67.2809	6.0261	8.07021	0.960546	9.55494	16.9967	73.4216	4.1454	16.4874	1.23539	78.6817	3.7769
X3Y2Z2	X3Y2Z2_022	14.9223	2.4421	143.078	15.6022	66.9933	11.0207	1630.12	101.186	888.265	54.9019	1.16474	0.673456	2388.12	123.127	5874.27	361.574	800.858	42.6807	2976.35	175.443	419.045	36.5609	67.6082	8.26671	264.545	23.9466	35.8238	2.76989	155.084	15.8098	30.3811	3.42974	82.3443	8.13173	10.1337	1.14189	58.0132	5.98867	8.51669	1.1321	1.88718	16.1477	72.279	3.88484	16.0216	1.05142	81.311	3.33725
X3Y2Z2	X3Y2Z2_023	11.6205	2.38349	142.087	12.9131	59.0511	11.2855	1717.12	107.518	909.063	65.9558	1.82472	0.90552	2377.22	110.039	5874.16	273.95	807.025	34.2338	3025.05	207.631	406.77	35.0708	71.9779	6.365	263.964	21.8551	32.2246	3.30878	162.503	13.7582	31.816	3.44587	87.4658	6.98235	12.1859	1.74884	57.5133	6.26998	8.84379	1.15041	3.26575	17.3707	68.2203	3.68798	13.461	0.813215	73.1302	2.99181
X3Y2Z2	X3Y2Z2_024	13.6926	2.35291	147.885	15.6116	66.6791	12.3848	1591.36	99.5852	843.464	58.4827	0.802666	0.597964	2365.62	160.808	5819.84	414.406	781.135	47.9276	2933.26	207.843	452.153	43.4292	67.8069	5.2725	276.166	23.508	34.9526	2.76127	175.547	18.5596	29.5507	3.04238	85.9175	9.58484	10.7816	1.67522	60.9649	7.65298	8.02073	0.919809	-0.916993	16.0403	73.6984	4.86948	16.6726	1.13229	79.017	3.61435
X3Y2Z2	X3Y2Z2_025	14.7699	2.87187	154.287	21.0664	65.1274	12.0974	1653.05	103.782	896.764	63.6145	1.41098	0.854831	2307.06	141.447	5796.78	347.705	808.299	48.3889	3003.03	200.793	379.725	27.618	67.7267	6.22206	275.145	21.6869	31.653	2.80488	168.04	13.3672	30.6439	2.84614	77.5843	7.35435	11.7049	1.7903	57.1622	8.25316	8.46622	0.847796	-2.25583	12.4497	69.4938	4.47108	13.1198	0.838345	76.872	4.17081
X3Y2Z2	X3Y2Z2_026	11.3884	2.50395	155.261	11.3373	64.9225	10.6261	1639.39	61.6736	903.105	42.9739	2.09076	0.668774	2473.9	95.113	6106.05	204.869	784.932	30.4267	2917.98	119.517	425.825	21.7326	68.1351	4.3771	273.28	16.8128	32.9892	3.0339	176.378	13.0882	32.2223	1.66086	90.1247	7.07646	12.6348	1.4328	65.3513	6.90187	8.51476	0.987464	10.1738	13.7313	69.1709	2.80189	15.1056	0.772612	76.3736	2.45404
X3Y2Z2	X3Y2Z2_027	13.1625	2.39751	144.521	13.8357	65.8301	8.23724	1693.67	53.8141	910.379	35.7194	1.4015	0.719905	2386.69	81.4962	5900.1	188.659	778.164	38.0437	2923.7	106.449	425.368	25.4397	73.3429	5.09344	289.212	19.3896	31.4196	2.43228	161.907	13.0748	31.8017	2.70385	88.9498	8.86025	10.2725	1.32378	64.0566	7.06069	8.89459	1.07943	3.58681	6.47243	70.8371	3.20965	13.5539	0.897923	77.0775	2.69503
X3Y2Z2	X3Y2Z2_028	13.1866	2.46737	147.223	10.74	70.7772	11.1014	1673.43	68.8781	923.842	37.5989	1.83858	1.15952	2427.06	100.492	5852.9	206.926	792.626	25.5248	2933.27	98.86	423.401	34.327	72.7398	4.53508	289.439	19.0228	32.7837	2.86509	171.267	12.7424	31.1812	2.66637	89.3144	6.82427	10.0557	1.02029	61.35	6.52113	8.56069	0.936212	-1.45402	0.204549	70.6377	2.27827	14.9144	0.858372	81.0649	2.88336
X4Y1Z1	X4Y1Z1_001	14.0314	0.867473	140.573	3.31332	54.9114	3.33687	1598.22	17.688	886.195	11.333	1.82676	0.324567	2646.95	29.0934	6649.99	70.1608	791.646	9.12751	2930.99	34.1963	416.39	9.0138	71.7298	1.8745	275.697	6.63364	31.7193	0.776694	165.994	4.03812	31.4337	0.922023	85.7734	2.79226	10.5631	0.565118	62.8829	2.28053	7.89773	0.338355	10.4462	5.25694	65.8442	1.2832	11.9217	0.389744	72.0669	1.06834
X4Y1Z1	X4Y1Z1_002	15.0187	0.908863	140.556	3.10604	57.1054	3.0665	1604.93	19.8415	890.213	11.2992	1.84685	0.350564	2641.12	29.2736	6590.88	67.6943	786.841	9.00635	2928.1	31.8622	425.257	10.5393	70.1845	1.88753	278.108	6.71896	30.5997	0.797942	167.121	4.24566	30.9676	0.912295	86.1771	2.61721	11.0192	0.509826	61.6178	2.58376	7.97357	0.301079	9.90084	4.96843	63.5774	1.23735	10.8596	0.349087	70.7346	1.13455
X4Y1Z1	X4Y1Z1_003	15.2356	0.96051	140.662	3.51221	54.8318	3.008	1597.64	17.5276	875.055	9.58794	1.95193	0.32799	2615.27	25.6264	6528.14	63.1278	783.661	9.33545	2904.76	33.142	413.676	9.38447	68.9126	1.91309	268.284	7.25003	30.6865	0.801492	164.594	4.45042	29.8745	0.85379	84.3353	2.65721	10.1572	0.475211	62.4052	2.40745	7.7379	0.288789	8.72573	5.00242	62.8455	1.21615	11.055	0.353134	69.2646	0.89471
X4Y1Z1	X4Y1Z1_004	14.657	0.795023	138.275	3.31659	55.3877	3.291	1605.18	15.4635	881.788	10.12	2.21827	0.377421	2620.93	30.6794	6567.16	62.4678	790.732	8.6114	2945.6	33.185	423.396	8.16397	70.2105	1.76643	277.223	6.59607	30.8825	0.849744	168.853	4.27049	30.486	0.78329	82.1248	2.11701	10.5269	0.564595	64.5872	2.82425	8.21288	0.343807	9.91806	5.46814	64.8042	1.15041	11.0305	0.304483	71.3355	1.0936
X4Y1Z1	X4Y1Z1_005	13.9499	0.773723	140.994	3.12812	56.9651	3.02917	1607.69	16.7279	908.632	12.1445	2.17219	0.352873	2674.19	29.0601	6690.75	76.2125	810.668	9.18656	3014.04	35.8906	429.397	9.50655	71.2234	1.96714	278.115	7.43137	32.2758	0.968589	165.918	3.54939	31.1786	1.01757	87.7074	2.8659	10.8425	0.512723	66.8833	3.02591	7.83296	0.277526	11.8718	5.82036	68.3988	1.36645	11.9361	0.320547	74.9181	1.09058
X4Y1Z1	X4Y1Z1_006	14.7109	0.811729	140.192	3.33821	56.0092	3.12699	1621.53	14.6159	914.623	10.3164	1.68306	0.30757	2706.65	25.7934	6686.23	68.2747	808.064	9.15861	3012.03	35.809	433.253	9.17867	72.4522	1.80986	282.68	7.17589	32.4998	0.904321	168.722	3.80784	31.461	0.943315	85.9273	2.36899	11.0883	0.493465	65.2348	2.48507	8.23026	0.294328	7.69906	5.12791	67.3511	1.19641	11.0606	0.339003	74.1662	1.12686
X4Y1Z1	X4Y1Z1_007	14.443	0.774702	140.689	3.21031	54.2549	2.68049	1596.89	16.6519	870.417	10.1565	2.03035	0.345709	2605.85	29.0365	6498.12	68.2474	780.363	7.66595	2883.79	29.289	408.139	8.37968	69.1744	1.51055	270.789	6.45721	31.2376	0.837474	164.87	4.4391	30.6368	0.886494	83.0191	2.51933	10.5762	0.472261	60.1035	2.32492	7.81081	0.309465	8.42962	5.40375	62.192	1.28073	10.2018	0.312944	69.1827	1.06657
X4Y1Z1	X4Y1Z1_008	14.4223	0.831784	137.713	3.5035	55.001	3.43476	1609.89	18.8784	869.415	11.1064	1.94889	0.324366	2598.37	31.6234	6476.86	60.938	787.871	9.31882	2898.14	38.6532	414.218	9.17661	69.9081	1.96211	265.593	7.34097	30.8218	0.837779	165.379	4.75608	30.1121	0.92893	82.5122	2.44565	10.3401	0.596356	59.5382	2.43859	8.0415	0.358234	5.75944	5.35162	62.423	1.12587	10.5543	0.32305	69.3717	1.07085
X4Y1Z1	X4Y1Z1_009	15.1905	0.918776	137.82	3.26389	53.4681	3.17418	1602.52	17.4383	874.573	11.3103	1.62601	0.302556	2623.79	29.5795	6518.31	70.6495	786.997	8.30778	2924.18	36.9081	418.869	8.72727	68.9369	1.75143	276.653	6.71222	31.3653	0.930844	164.595	4.12793	29.9125	0.839217	83.4985	2.38135	10.4618	0.511421	63.2671	2.98536	7.6813	0.314722	7.81686	5.54481	64.1052	1.01006	11.7944	0.311972	70.8843	0.974095
X4Y1Z1	X4Y1Z1_010	15.0091	0.854571	141.63	2.99067	57.6845	2.84947	1595.35	17.8629	876.031	10.3189	1.71534	0.283412	2595.38	29.6257	6481.41	67.7419	787.291	9.31863	2893.92	35.636	414.083	9.37116	68.5995	1.81174	268.796	7.71254	30.3485	0.882988	165.84	4.09901	29.9933	0.887273	83.4041	2.80477	10.4329	0.538537	62.7514	2.46198	7.80629	0.317341	4.91603	4.90878	64.0651	1.17006	11.2962	0.357254	71.0996	1.13949
X4Y1Z1	X4Y1Z1_011	14.589	0.791119	137.615	3.12277	55.3018	3.38635	1618.26	15.8761	886.059	11.7792	1.79582	0.358568	2599.87	30.578	6568.66	59.9236	791.068	7.8748	2895.07	35.8327	425.692	8.12527	70.1996	1.7609	267.321	6.58621	31.3772	0.997199	165.808	4.2473	31.0924	0.851077	84.7863	2.72538	10.6842	0.537089	62.5463	2.48716	8.28259	0.332454	6.99678	5.91882	66.0764	1.34812	11.6773	0.31277	71.1186	1.08066
X4Y1Z1	X4Y1Z1_012	14.9557	0.903512	136.119	2.93334	55.4843	3.39298	1598.68	17.734	878.66	9.71599	1.78814	0.358913	2632	29.1006	6512.88	70.8829	791.254	9.05051	2916.09	34.0516	410.339	8.88538	70.0836	1.909	283.029	6.65025	30.9725	0.785484	164.547	3.88421	29.7707	0.912077	84.0476	2.5312	10.8094	0.520379	59.6477	2.40425	8.15739	0.300754	3.98618	4.68542	65.426	1.32697	11.6781	0.303588	72.2987	1.10182
X4Y1Z1	X4Y1Z1_013	14.8977	1.00115	123.192	3.68894	57.2986	3.85388	1658.94	16.7454	886.09	11.077	1.56365	0.284429	2704.96	29.4516	6641.67	68.694	800.84	8.67593	2950.98	35.8489	416.857	8.65722	69.4586	1.96817	274.393	6.31952	31.9339	0.864742	162.86	3.46067	30.7622	0.829761	83.0069	2.34332	10.6952	0.486542	62.5699	2.52392	8.20933	0.275041	4.12164	4.70494	58.2886	1.19081	7.88702	0.345019	64.649	1.06582
X4Y1Z1	X4Y1Z1_014	14.9556	0.961086	137.086	3.24054	55.8559	3.28684	1582.92	18.0093	882.484	10.6542	1.86622	0.320812	2608.35	26.1316	6537.55	66.2442	788.305	9.15478	2930.73	29.8101	416.547	9.46817	69.1393	1.84857	272.848	7.04442	30.8974	0.825817	161.678	3.67712	30.7659	0.940318	81.4105	2.30519	10.2933	0.470636	61.2882	2.20924	7.94633	0.302246	8.76915	5.59958	63.5025	1.19428	11.5355	0.322548	70.9815	1.13006
X4Y1Z1	X4Y1Z1_015	13.3725	1.40237	135.613	7.46431	48.7752	4.76782	1616.88	21.3597	855.418	17.4606	1.13784	0.362097	2517.41	48.6399	6294.04	94.5021	770.98	12.6941	2860.25	51.6131	403.559	13.2341	67.6867	2.84775	263.432	10.919	28.5205	1.32566	157.587	6.47132	29.1313	1.45575	78.254	4.34788	8.98769	0.680625	55.3176	3.7801	7.54467	0.522994	-3.42544	6.52586	60.3256	2.25268	9.97476	0.600441	67.0122	2.04445
X4Y1Z1	X4Y1Z1_016	15.2894	0.987868	137.038	2.91529	55.1842	3.00331	1587.96	19.3856	875.626	9.81702	1.66135	0.335254	2600.18	28.8702	6526.91	65.8787	787.201	8.73105	2930.49	37.707	414.243	8.78809	68.5453	1.74601	272.136	6.45179	31.1599	0.917044	164.948	4.08116	30.663	0.841608	84.9624	2.41044	10.5724	0.506184	62.8454	2.33078	7.86079	0.269872	6.0833	5.32517	66.3932	1.51878	12.2704	0.266442	73.2485	1.08017
X4Y1Z1	X4Y1Z1_017	15.0142	0.979209	136.089	3.22153	52.5719	2.89882	1595.08	17.4707	871.641	10.6656	1.94059	0.355596	2607.57	26.4394	6452.08	62.4677	782.814	8.72442	2891.42	32.5961	412.939	8.58314	68.7464	1.87423	269.037	6.74916	29.9709	0.792033	161.807	4.34551	30.4665	0.874936	83.8555	2.12841	10.3539	0.472656	59.9773	2.86585	7.8877	0.291319	3.6584	4.30998	62.1093	1.21822	10.4818	0.318538	68.6935	1.22959
X4Y1Z1	X4Y1Z1_018	14.6134	0.944293	136.239	3.36669	56.3176	3.09298	1591.18	20.1095	885.457	11.2098	1.75169	0.335161	2573.7	31.6977	6494.79	66.7186	772.567	8.14816	2883.42	38.4921	410.114	8.10446	68.1656	1.87016	266.909	7.13017	30.7464	0.881452	163.153	3.87462	30.4986	0.982939	84.0326	2.72481	10.2963	0.474197	60.1094	2.63995	7.75034	0.313349	8.73938	5.1769	63.3445	1.12799	10.4937	0.320913	69.067	1.00286
X4Y1Z1	X4Y1Z1_019	14.4217	0.873413	137.313	3.06371	56.8429	3.35143	1606.06	15.8904	871.656	10.7157	1.72803	0.34478	2575.95	28.068	6415.86	61.7831	774.481	9.65292	2891.15	34.2074	407.628	8.66985	68.0214	1.62351	270.235	5.9042	30.4436	0.86132	158.945	4.0684	30.8817	0.941306	82.823	2.22739	10.394	0.468009	61.5572	2.96149	7.74801	0.318945	13.2502	6.13725	60.6428	1.39596	9.83933	0.315922	66.4639	0.88563
X4Y1Z1	X4Y1Z1_020	14.4371	0.846857	138.177	3.41023	53.3851	3.22465	1593.71	18.5328	875.273	9.20981	1.65404	0.300146	2568.97	27.4721	6419.21	74.5096	779.968	8.57194	2875.05	33.1153	406.198	8.76873	68.1983	2.0578	275.53	6.4494	30.4552	0.84661	163.313	4.64713	30.0381	0.860296	83.9809	2.82099	10.6908	0.492144	60.1272	2.81448	7.85959	0.333453	9.70796	5.0979	62.2568	1.26607	10.5933	0.300214	67.9006	1.14948
X4Y1Z1	X4Y1Z1_021	13.7015	2.22441	146.211	14.7537	64.0538	10.2463	1738.72	99.0553	940.154	56.0737	2.6088	0.873699	2593.48	133.873	5979.08	353.919	820.808	42.4201	2922.87	150.608	423.074	23.8002	66.2197	4.82812	268.626	18.8787	33.4636	2.57102	156.457	10.8516	35.0111	2.29343	100.278	10.4467	9.95415	1.00772	61.1427	9.79235	8.15311	0.944324	16.3658	13.67	76.6515	3.55773	14.7852	1.04746	77.0638	2.64007
X4Y1Z1	X4Y1Z1_022	16.5381	3.01069	136.156	13.412	60.9456	10.9738	1799.26	135.696	948.7	35.8337	2.3502	1.12514	2542.31	107.451	5746.99	329.169	836.874	57.769	2876.46	149.946	433.825	34.1937	71.8648	4.72279	278.361	19.4542	33.3058	3.62535	166.049	13.3508	32.994	3.06997	89.4985	9.80362	9.91056	1.14149	66.8338	7.53363	7.97519	1.00519	19.3495	15.1448	71.0708	3.50388	13.6566	0.884219	76.8389	3.04715
X4Y1Z1	X4Y1Z1_023	13.5458	2.60828	138.299	13.3368	56.6538	11.9066	1665.32	75.9384	937.089	79.421	1.50745	0.766985	2531.97	115.978	6007.4	295.537	805.298	39.734	2939.9	143.046	433.091	27.6353	74.0105	5.25681	275.734	22.7996	31.7568	2.45731	151.861	12.4477	34.3067	3.13457	95.4076	9.19581	10.4509	0.792285	71.2272	6.80335	8.50911	0.951265	3.40432	6.23449	72.9161	3.78317	15.7781	1.05535	78.2489	2.78693
X4Y1Z1	X4Y1Z1_024	12.93	2.81443	144.635	11.6806	57.4749	10.2677	1816.91	101.076	966.541	52.2337	3.01591	1.15658	2710.28	151.508	6076.64	342.511	851.69	51.4015	3043.17	203.561	450.226	25.9413	74.1616	6.92186	286.322	16.2448	35.487	2.83393	171.039	16.5724	33.9835	3.19613	97.4255	8.7956	11.5174	1.25349	64.1007	6.74465	8.2027	0.778439	21.1243	16.1851	75.8722	3.69673	14.3782	1.17074	80.7349	3.44853
X4Y1Z1	X4Y1Z1_025	14.4169	2.96615	154.167	13.396	50.0304	10.495	1781.77	80.5983	944.713	47.4381	2.74598	1.42339	2593.22	108.658	5916.99	238.649	840.961	32.9559	3026.76	144.03	421.871	28.322	74.1406	5.29667	267.041	20.6728	32.7186	2.93641	177.329	13.107	33.5712	3.61235	86.8026	8.37017	10.9325	1.60408	70.2837	9.64787	8.53625	0.996672	4.04123	13.8632	76.1814	3.64771	16.3154	0.8731	82.6308	2.83424
X4Y1Z1	X4Y1Z1_026	13.4964	3.21268	147.293	10.4932	62.5962	6.56005	1723.88	73.6272	908.18	31.3424	2.13565	1.14969	2519.94	94.8642	5695.6	209.256	800.733	22.8692	2909.49	97.2298	412.254	30.7266	75.1979	5.14286	277.229	20.7399	30.9691	1.98153	161.715	12.7083	30.3227	2.36965	90.6321	7.61456	11.9631	1.09741	65.4514	8.92316	8.21372	0.922993	-9.35824	0.352501	71.8778	3.55685	14.2249	0.754444	75.8972	1.552
X4Y1Z1	X4Y1Z1_027	14.2113	2.90164	135.21	12.4421	60.1708	9.70364	1701.62	115.424	900.642	48.9542	1.36516	0.744379	2475.81	121.859	5684.28	277.33	776.934	45.9032	3003.69	182.372	408.655	34.3435	72.5465	6.18551	278.462	25.6569	31.9871	3.51506	162.348	14.9625	33.8756	2.88526	91.5203	9.70085	9.60271	1.04784	63.2469	7.52842	8.71878	0.846257	11.0466	19.3758	73.1479	4.08225	14.0817	0.827717	79.8173	2.96309
X4Y1Z1	X4Y1Z1_028	14.7228	2.38557	141.593	10.7811	72.1312	10.8485	1736.89	87.4982	931.39	47.1462	3.12799	1.31574	2661.59	146.674	6223.1	255.19	836.681	39.9802	2977.94	147.678	409.906	24.7892	70.9711	6.38737	306.156	22.12	34.2241	2.90992	176.987	13.8559	33.4316	3.30293	90.6328	10.3681	11.0305	1.35356	59.983	7.75734	8.21434	0.903835	5.7998	15.5636	74.5165	2.86193	14.2346	0.825209	80.5514	3.427
X4Y2Z2	X4Y2Z2_001	15.1386	0.913123	143.485	3.48945	55.1578	3.12834	1616.47	18.3405	881.09	9.27356	2.07519	0.35131	2651.42	24.2753	6705.75	55.6056	799.5	7.89268	2992.55	35.3079	427.182	7.81351	71.8389	1.98961	282.543	7.79866	31.4678	0.899991	169.893	4.51303	31.9132	0.839182	84.687	2.36994	10.8142	0.477693	61.6966	2.72917	8.01647	0.318805	7.99822	5.08527	71.0088	1.30756	13.0062	0.368412	76.8549	1.19853
X4Y2Z2	X4Y2Z2_002	14.1821	0.83999	141.159	3.12347	55.399	3.31767	1614.66	15.5788	877.715	10.4542	1.73221	0.341175	2621.1	26.8151	6641.71	66.5795	789.876	8.82243	2979.33	35.9775	422.535	8.40541	70.6246	1.65223	278.932	7.22461	30.7073	0.950976	168.884	4.49322	31.8203	0.989604	85.1212	3.08923	10.4206	0.435521	62.1468	2.7334	8.0973	0.346724	8.01452	4.61863	69.4205	1.34759	12.8526	0.362607	76.9032	1.32527
X4Y2Z2	X4Y2Z2_003	14.1163	0.854743	142.452	3.62539	54.1273	3.0462	1613.18	19.6615	873.789	9.66187	1.66744	0.330051	2566.05	32.3473	6572.41	59.4178	778.856	7.87434	2978.79	37.5957	418.793	9.2265	70.0615	1.67139	275.988	6.73273	31.1333	0.925951	163.892	4.17137	30.5822	0.933838	82.3497	2.45871	10.8551	0.480045	61.547	2.44657	8.00858	0.350817	17.4257	6.09892	66.8346	1.16263	12.7267	0.337546	73.1159	0.962493
X4Y2Z2	X4Y2Z2_004	15.2769	0.839146	141.116	3.63623	55.6901	2.70467	1631.31	16.2559	869.8	11.5949	1.60935	0.349437	2591.91	29.9794	6581.4	63.6311	789.697	8.4673	2958.78	36.4406	407.065	8.47552	69.6603	1.90834	275.858	7.04398	30.1807	0.894311	164.441	4.27134	30.3146	0.890434	85.102	2.42285	10.556	0.537303	61.1817	2.55624	8.05284	0.318189	4.53583	3.88195	66.2404	1.32699	12.2093	0.385034	72.2241	1.09298
X4Y2Z2	X4Y2Z2_005	13.8289	0.701291	141.739	3.07317	53.266	3.07718	1615.8	17.1696	866.995	9.83476	2.26923	0.372486	2584.53	28.1509	6539.84	61.4163	771.753	9.35901	2917.3	34.5679	413.381	9.57792	69.2812	1.54139	274.391	5.45309	30.1528	0.826791	164.488	4.00153	31.0502	0.932697	83.9311	2.34124	10.5043	0.517806	61.824	2.55518	7.7899	0.279137	8.78986	5.53353	65.2506	1.26621	10.8707	0.325244	70.5943	1.2056
X4Y2Z2	X4Y2Z2_006	15.3515	0.845118	141.816	3.16135	54.087	3.5696	1632.8	17.1606	888.978	10.5443	1.81536	0.307376	2668.17	27.024	6694.16	57.0986	795.045	9.7495	3016.62	35.5164	418.961	9.4744	72.203	1.66691	283.41	7.14191	31.6007	0.90906	171.959	4.17175	31.4671	0.860369	87.7948	2.41046	11.0154	0.6271	62.9846	2.69437	8.05587	0.352256	2.2682	4.29512	67.8651	1.29825	11.1849	0.332564	74.7526	1.04424
X4Y2Z2	X4Y2Z2_007	15.3206	0.795356	141.266	3.1709	53.9874	3.25077	1612.36	17.9913	871.632	11.0627	1.72549	0.351669	2579.03	27.508	6597.98	65.1056	783.735	8.11866	2966.1	30.3125	414.064	8.10642	69.2977	1.69774	278.548	7.58289	30.3137	0.862157	163.627	4.35012	30.6829	0.941541	83.6294	2.51842	10.7549	0.443168	61.4336	2.55333	8.04562	0.318759	4.55545	5.14316	67.4395	1.17161	12.5415	0.360521	72.6546	0.966174
X4Y2Z2	X4Y2Z2_008	14.9716	0.923004	138.392	3.35924	55.3679	3.03268	1600.68	15.7272	871.079	9.85656	1.67175	0.299924	2603.59	28.1058	6535.97	65.4644	777.613	8.66948	2925.9	36.1926	408.758	8.9467	69.642	1.65273	279.75	6.00182	30.6558	0.80868	164.119	4.63833	30.5123	0.946648	83.46	2.37928	10.4136	0.457776	61.3985	2.71046	7.91031	0.326872	5.72793	5.28201	66.6048	1.19113	12.2512	0.340349	71.8371	1.15963
X4Y2Z2	X4Y2Z2_009	14.7106	1.00685	138.646	3.22199	54.0847	3.63724	1592.18	18.3986	875.816	10.8486	1.99969	0.354759	2544.43	27.0158	6479.79	67.3641	776.592	7.63744	2921.08	36.0147	414.827	8.92936	70.1581	1.94826	275.541	6.81724	30.8971	0.838648	161.916	4.40513	30.5779	0.875473	83.4131	2.5843	10.1971	0.500041	59.0135	2.6991	7.84786	0.344745	4.9419	5.05316	67.8564	1.46104	12.4043	0.377547	73.8461	1.22222
X4Y2Z2	X4Y2Z2_010	14.5028	0.97463	139.452	3.19456	54.8179	3.86486	1625.9	17.9265	875.177	10.701	1.74476	0.340228	2589.71	28.259	6540.34	70.4634	778.461	7.89177	2926.1	32.3265	408.83	8.68644	68.3324	2.05701	267.113	5.64382	30.2768	0.863423	164.029	4.01261	30.1601	0.905626	82.9494	2.52415	10.3139	0.524702	63.2999	2.52946	7.71981	0.323499	7.52874	5.44133	66.3439	1.33084	12.6865	0.344624	72.508	1.09567
X4Y2Z2	X4Y2Z2_011	14.2738	1.04749	133.25	3.07123	57.1156	3.65416	1616.92	16.0855	886.507	10.0826	1.84854	0.379957	2606.6	28.3628	6619.96	64.1525	785.315	8.48837	2979.07	37.2554	416.845	8.13204	71.4946	1.71136	277.713	6.74198	31.5427	0.867858	168.33	4.55326	31.3569	0.930032	85.8388	2.79885	10.8003	0.528543	64.2533	2.52626	7.81165	0.306259	8.13765	5.84223	68.8147	1.3741	12.0448	0.366105	74.5608	1.28223
X4Y2Z2	X4Y2Z2_012	14.3057	0.931577	139.354	3.22105	56.6342	3.4261	1634.03	17.0928	897.251	9.73227	1.62991	0.259647	2619.55	28.382	6641.09	68.2276	792.8	9.11235	2958.1	41.1892	413.455	9.21547	70.3684	1.845	280.399	6.98957	32.1018	0.929066	167.723	4.42941	31.0572	1.04251	86.8241	2.54962	9.9948	0.475595	62.3953	2.71259	8.08902	0.353693	3.82597	4.8074	63.696	1.13975	10.5352	0.314653	70.5867	1.0715
X4Y2Z2	X4Y2Z2_013	14.3079	0.8069	139.097	2.83265	53.8396	3.47345	1619.96	17.0418	891.624	10.6818	2.05366	0.356818	2612.73	31.1815	6627.6	66.4308	785.553	8.19717	2940.77	31.2962	424.789	8.51545	70.874	1.83601	280.375	7.22566	30.7451	0.819484	169.577	4.4791	30.7497	0.925163	86.2334	2.86582	10.285	0.439964	60.996	2.66466	8.06269	0.349385	8.74976	5.5546	68.6382	1.32194	12.0679	0.379301	74.847	1.27781
X4Y2Z2	X4Y2Z2_014	14.6406	0.926001	140.095	2.94611	55.3666	3.26145	1620.66	18.2593	897.15	9.12601	1.77043	0.299036	2591.86	28.8906	6588.66	63.7174	779.841	9.0203	2954.3	34.1016	419.049	9.18756	67.8509	1.91605	272.533	6.43567	31.3389	0.905192	164.79	3.55818	31.1976	0.817945	82.2648	2.54273	10.3822	0.496485	63.2495	2.94354	8.2054	0.3489	6.90915	5.2007	66.6959	1.3521	12.3525	0.407667	73.194	1.16457
X4Y2Z2	X4Y2Z2_015	14.6874	0.836279	141.588	3.859	57.7649	3.41779	1613.08	17.8421	893.442	10.1533	1.86003	0.337355	2626.34	31.8591	6625.12	58.9804	785.601	9.2359	2957.97	37.8767	411.652	8.64744	71.094	1.70241	273.287	6.82291	31.3049	0.911243	165.761	4.01212	30.8247	0.92808	85.885	2.9349	11.0669	0.502721	63.5163	3.0156	7.89389	0.369052	7.36417	5.20985	68.039	1.19087	12.5123	0.381691	74.4887	1.11011
X4Y2Z2	X4Y2Z2_016	14.9044	0.923956	134.453	3.32657	58.1884	3.04738	1644.57	19.3002	904.996	12.0887	1.83398	0.314026	2693.84	31.01	6719.47	59.5547	784.565	8.40996	2998.74	35.6996	418.29	9.2487	71.2352	1.79106	280.033	6.88003	31.7093	0.951128	166.147	4.78313	31.5928	0.870656	85.7573	3.06054	10.6964	0.454893	64.5021	2.64675	8.33785	0.295977	5.12706	4.84369	62.0114	1.1831	8.77567	0.282765	68.9074	1.1178
X4Y2Z2	X4Y2Z2_017	14.486	0.97711	139.723	3.11	57.1298	3.44266	1595.1	18.2713	885.513	10.2681	1.80089	0.326986	2583.47	28.0539	6512.68	64.2714	778.65	8.71228	2943.97	33.1454	412.548	9.12898	70.2903	1.74793	272.786	6.68084	31.3799	0.814957	162.392	3.66119	30.7111	0.826209	84.7554	2.45156	10.7002	0.539557	63.5166	2.74412	7.87315	0.311927	5.33488	4.75763	66.6508	1.25149	12.5643	0.32275	74.1189	1.17805
X4Y2Z2	X4Y2Z2_018	15.0794	1.02712	143.756	2.96391	55.3308	3.52581	1621.3	15.9511	886.192	11.7542	1.71933	0.304686	2562.89	35.3037	6514.5	69.1049	769.883	9.05284	2959.66	34.0628	411.796	9.51123	70.9303	2.01682	274.447	6.47184	30.6397	0.800902	163.801	4.39164	30.6434	0.947794	86.4668	2.40487	10.7312	0.544862	62.3799	2.72559	7.64116	0.267364	6.67109	4.9085	66.6727	1.36701	12.8497	0.317803	74.5974	1.04544
X4Y2Z2	X4Y2Z2_019	14.9244	0.837075	136.748	3.0641	59.7983	3.47146	1590.48	19.4154	893.322	10.7272	1.81082	0.335383	2594.81	27.3945	6517.88	58.9046	785.815	8.57395	2919.24	34.7014	418.048	8.58274	70.5321	1.78822	270.603	7.14401	31.342	0.896549	162.68	4.16938	30.3466	0.900238	83.2234	2.7207	10.6358	0.500549	62.8028	2.47504	7.93416	0.311115	6.30329	4.62938	68.4276	1.41028	12.7651	0.403457	74.6778	1.29247
X4Y2Z2	X4Y2Z2_020	13.9334	0.774126	141.414	3.27534	58.3366	3.41651	1607.48	16.5262	884.866	9.05972	1.63566	0.317715	2604.81	26.0856	6571.04	62.4949	773.79	8.94287	2921.28	30.3138	415.707	8.931	69.0263	2.03443	274.099	6.5127	31.7256	0.800076	165.736	3.74016	30.2165	0.8712	85.4004	2.66612	10.381	0.467953	63.2877	2.31483	7.93252	0.345647	9.63252	5.06745	67.5318	1.26567	12.2548	0.366385	73.7604	1.03383
X4Y2Z2	X4Y2Z2_021	12.8094	2.76101	154.479	13.6026	65.5064	13.65	1722.39	74.0831	914.42	49.8031	2.01629	1.0909	2453.36	141.65	5828.04	350.026	811.833	56.4681	2913.29	175.291	435.304	30.3772	70.0833	4.83318	277.692	23.1523	30.9164	2.4352	168.743	13.659	33.025	2.21282	95.8583	7.9266	12.4599	1.75047	63.1473	5.90071	7.51457	0.859133	6.66894	16.2808	74.3643	3.97351	15.8813	1.30774	79.9562	2.89518
X4Y2Z2	X4Y2Z2_022	13.0928	2.73078	154.227	16.0313	59.9853	11.7334	1740.49	107.987	924.919	46.703	1.50661	0.756523	2621.03	162.425	5986.49	355.609	846.283	46.1959	3048.54	185.377	430.36	30.9356	69.1952	5.74445	283.099	24.5729	34.5489	2.27016	166.835	17.0433	35.076	3.10674	100.093	8.0932	11.0043	1.5019	68.1115	8.71276	8.81006	0.92269	1.91581	14.4805	72.3825	3.43585	14.2713	0.882887	79.1757	3.1367
X4Y2Z2	X4Y2Z2_023	13.7722	3.44141	156.227	18.2563	48.9358	11.6798	1654.24	125.338	933.047	51.3829	1.03241	0.893911	2591.18	184.315	6101.82	441.68	822.931	46.8156	2917.62	159.887	431.66	33.62	69.7604	6.5361	266.221	20.6026	32.0921	2.41381	171.433	15.7042	32.0059	2.88023	90.482	10.5302	11.4024	1.51155	70.4393	8.40829	8.27998	0.874267	14.2184	19.1897	81.2399	4.75821	17.9503	0.887341	87.6405	4.19252
X4Y2Z2	X4Y2Z2_024	12.1055	2.7303	141.573	12.9252	63.965	12.1167	1706.34	102.093	908.996	61.6836	1.20627	0.88264	2477.13	151.343	5918.66	342.113	825.133	46.4359	3051.13	260.619	441.247	30.1827	75.1738	8.85775	291.878	25.7593	34.0556	3.101	173.067	14.2561	31.1795	2.6674	92.915	11.0751	11.7681	1.63321	69.0455	7.816	9.17449	0.99116	-12.0704	0.401704	77.758	3.33675	16.4054	0.884284	82.5308	3.14586
X4Y2Z2	X4Y2Z2_025	18.2707	2.5514	159.295	18.1767	58.9211	11.0034	1674.14	80.7154	936.038	50.0086	2.12372	0.965425	2514.2	120.605	6086.54	406.363	833.415	41.466	2814.25	169.317	446.348	33.8022	70.3892	5.1095	266.92	18.2189	33.203	3.41101	179.613	16.3921	32.0785	3.31037	92.4604	7.32365	9.86436	1.40971	68.7589	7.27938	8.53931	1.19281	8.81208	15.379	75.1303	4.29589	15.9814	1.05251	81.6811	3.41483
X4Y2Z2	X4Y2Z2_026	15.0321	2.58402	158.576	20.316	62.4255	11.3933	1734.42	117.428	919.844	65.161	0.907901	0.678844	2482.18	142.915	5934.06	283.644	838.916	58.6148	2956.22	155.061	427.061	27.6391	72.3126	7.50714	275.331	16.7134	29.9413	2.78613	167.674	14.8814	31.9154	3.02816	88.6796	9.03774	11.1781	1.21283	67.107	8.03391	8.0201	0.904201	7.9269	14.9104	73.0453	5.10235	14.7789	1.12514	79.9343	3.67287
X4Y2Z2	X4Y2Z2_027	16.1272	3.16946	158.013	15.7481	62.6462	10.9823	1713.68	82.3746	921.554	63.7749	1.3743	0.832077	2546.68	140.435	5665.39	267.191	805.302	43.3329	2913.53	143.4	479.131	28.9385	73.6218	6.49308	279.369	18.765	33.6406	2.54478	159.539	16.8005	31.6153	2.08004	88.6648	8.58257	11.3468	1.33124	69.5018	7.95953	7.7035	0.927567	14.4778	17.0479	72.548	3.58439	16.1559	0.940148	79.8764	3.58801
X4Y2Z2	X4Y2Z2_028	11.6307	2.17792	152.041	12.9095	52.6571	9.76463	1696.78	85.2687	933.809	34.8047	1.88146	0.669282	2488.55	89.8479	5955.41	257.251	815.176	35.3502	2935.82	148.584	429.59	25.7412	68.3256	6.0408	287.062	16.5565	33.7409	2.27959	156.176	14.4986	34.7672	2.26296	91.8984	7.04312	11.4934	1.59866	65.9099	7.59458	7.88587	0.980026	-14.762	0.621733	71.8064	3.41843	16.0118	1.09715	81.5953	2.96165
[truncated: 8 more columns]
