# Supplementary material for: OLG: a new potential reference material for apatite (U–Th)/He dating
Source: Royal Society of Chemistry journal article supplement (doi:10.1039/d5ja00246j), 2025-11-25
Supplement: d5ja00246j2.xlsx [file d5ja00246j2.xlsx]

## Sheet: Sheet1
Sample	Tracks	Area(μm2)	U(ppm)	U_SE(ppm)	Age(Ma)	Age_SE(Ma)	Dpar	Dpar_SE		Length Number	Apparent Length (μm)	Corrected Z Depth (μm)	True Length (μm)	Azimuth (°)	Dip (°)	Angle to CAxis (°)	TINT/TINCLE
X1Y1Z1	85	1005.81	108.231	1.5815	149	16	2.85077	0.157784		1	14.29	0.818	14.3134	67.8498	3.27619	67.8879	T
X1Y1Z1	64	1002.87	109.2	2.25453	112	14	2.67648	0.136912		2	11.0667	1.636	11.1869	86.7641	8.40921	86.7989	T
X1Y1Z1	73	1010.68	113.725	1.83639	121	14	2.84367	0.326758		3	9.77817	1.636	9.91408	63.9465	9.49827	64.3299	T
X1Y1Z1	77	1006.77	108.958	2.10851	134	15	2.62704	0.0712799		4	14.1334	1.636	14.2278	37.0282	6.60283	37.5291	T
X1Y1Z1	67	997.008	107.542	1.59453	120	15	2.6676	0.115833		5	13.0267	2.454	13.2558	33.8806	10.6685	35.3284	T
X1Y1Z1	74	1013.47	109.547	2.16394	128	15	2.44148	0.296506		6	10.5472	1.636	10.6734	45.8999	8.81698	46.5524	T
X1Y1Z1	90	1010.68	107.897	2.10783	157	17	2.42752	0.232492		7	13.3077	2.454	13.5321	60.6841	10.4482	61.2162	T
X1Y1Z1	90	986.418	109.248	2.05602	159	17	2.62381	0.111623		8	13.2942	4.908	14.1713	58.6596	20.2633	60.7953	T
X1Y2Z2	79	996.028	111.262	1.66447	136	15	2.68601	0.304813		9	9.64278	2.454	9.95014	85.0267	14.2782	85.1807	T
X1Y2Z2	84	1006.79	108.097	2.09943	147	16	2.83686	0.263366		10	11.6465	4.09	12.3438	65.0668	19.3502	66.5625	T
X1Y2Z2	78	998.929	110.206	2.21635	135	16	3.2313	0.403668		11	10.7381	4.09	11.4906	79.8322	20.8512	80.5045	T
X1Y2Z2	64	1000.95	106.976	2.03044	114	14	2.64896	0.335457		12	10.1529	4.908	11.277	65.5689	25.7995	68.138	T
X1Y2Z2	81	1012.64	106.975	1.75196	143	16	3.02547	0.377284		13	8.11576	3.272	8.75052	65.9558	21.9576	67.7972	T
X1Y2Z2	61	976.582	108.632	2.39902	110	14	3.26789	0.397942		14	9.33923	1.636	9.48144	74.9691	9.93598	75.1998	T
X1Y2Z2	78	1009.68	109.503	2.2466	135	15	2.99663	0.231953		15	8.19427	2.454	8.55384	68.3466	16.6718	69.2997	T
X1Y2Z2	87	999.012	108.881	1.65882	153	17	2.86415	0.292387		16	12.6587	3.272	13.0748	72.7076	14.4925	73.2743	T
X2Y1Z1	70	1002.94	113.682	2.71246	117	14	3.22243	0.298948		17	13.7438	2.454	13.9612	49.6775	10.1236	50.4305	T
X2Y1Z1	73	1010.64	115.739	3.1532	119	14	2.76337	0.116264		18	11.9578	3.272	12.3973	59.9139	15.3032	61.0841	T
X2Y1Z1	75	1014.63	111.776	2.2964	126	15	2.86332	0.152478		19	11.1069	2.454	11.3747	33.8205	12.459	35.7847	T
X2Y1Z1	77	1016.56	110.329	1.67038	131	15	3.2562	0.335652		20	9.7731	1.636	9.90909	63.6099	9.5031	63.9994	T
X2Y1Z1	69	1005.7	109.982	1.93119	119	15	2.67087	0.18269		21	10.4762	5.726	11.9389	82.3686	28.6598	83.3081	T
X2Y1Z1	76	1013.64	109.598	1.86357	131	15	2.8112	0.465761		22	8.47005	1.636	8.6266	8.81262	10.9321	14.0081	T
X2Y1Z1	67	996.092	108.606	2.78454	119	15	3.0208	0.166024		23	13.4481	1.636	13.5473	19.9257	6.9361	21.0519	T
X2Y1Z1	83	993.174	111.765	1.58498	143	16	2.89166	0.259757		24	13.9423	2.454	14.1566	47.1334	9.98244	47.9333	T
X2Y2Z2	70	993.044	113.481	1.89789	119	14	2.91906	0.289546		25	8.33399	4.908	9.6718	74.6901	30.4944	76.849	T
X2Y2Z2	65	1002.86	110.214	2.45349	113	14	3.01701	0.131956		26	11.2076	2.454	11.4731	86.1017	12.3505	86.1921	T
X2Y2Z2	79	988.3	108.679	2.21994	140	16	2.93161	0.332354		27	10.7381	5.726	12.1694	56.9404	28.0684	61.2263	T
X2Y2Z2	83	1005.81	112.122	1.94377	141	16	3.25826	0.522122		28	8.15464	1.636	8.31713	85.4536	11.3442	85.5426	T
X2Y2Z2	83	997.995	110.267	2.00383	144	16	2.78258	0.22198		29	8.55823	3.272	9.16238	38.5054	20.923	43.034	T
X2Y2Z2	63	1001.87	109.524	2.21445	110	14	3.12993	0.155777		30	10.0613	3.272	10.58	87.7336	18.0149	87.8448	T
X2Y2Z2	84	1002.89	108.489	2.2416	147	16	2.38143	0.426463		31	12.5097	2.454	12.7482	58.4758	11.0986	59.1308	T
X2Y2Z2	83	1004.84	108.939	1.87355	145	16	2.84577	0.172772		32	11.5572	1.636	11.6724	6.32352	8.0571	10.2294	T
X3Y1Z1	82	992.149	112.078	1.6744	141	16	2.74815	0.479093		33	11.3159	1.636	11.4336	70.7799	8.22654	70.9853	T
X3Y1Z1	75	1000.93	109.696	2.22134	131	15	2.66997	0.597753		34	9.00265	0.818	9.03974	70.2866	5.19176	70.3708	T
X3Y1Z1	86	1009.7	112.23	1.73507	145	16	2.68556	0.194119		35	10.3031	1.636	10.4321	68.4784	9.02254	68.7577	T
X3Y1Z1	80	1004.81	108.892	1.7528	140	16	2.83186	0.208902		36	10.731	4.09	11.484	61.8804	20.8638	63.87	T
X3Y1Z1	74	995.102	110.449	1.88261	129	15	2.92895	0.296666		37	10.831	3.272	11.3145	88.2796	16.8093	88.3532	T
X3Y1Z1	71	1009.69	106.179	1.7822	127	15	2.99119	0.203288		38	12.7263	1.636	12.831	50.808	7.32536	51.1883	T
X3Y1Z1	73	1002.82	108.608	1.28768	128	15	2.99631	0.431201		39	9.91748	1.636	10.0515	63.3462	9.36723	63.7291	T
X3Y1Z1	88	997.046	106.524	1.49112	158	17	3.19705	0.348024		40	10.4973	2.454	10.7803	60.6778	13.158	61.5192	T
X3Y2Z2	80	998.974	106.648	1.86761	143	16	2.87308	0.15767		41	9.38319	2.454	9.69879	62.0256	14.6564	63.0114	T
X3Y2Z2	75	1007.75	104.194	2.20184	136	16	2.9093	0.212992		42	11.9616	4.908	12.9294	73.8107	22.309	75.052	T
X3Y2Z2	85	1012.66	107.321	2.25117	149	17	2.73441	0.513724		43	11.6036	2.454	11.8602	74.7782	11.9413	75.1153	T
X3Y2Z2	86	1011.65	107.537	2.37768	151	17	2.84729	0.360655		44	13.2629	2.454	13.4881	83.1732	10.4827	83.2876	T
X3Y2Z2	85	1014.57	108.312	2.08422	148	16	2.88236	0.305477		45	9.38035	2.454	9.69604	81.4699	14.6606	81.7496	T
X3Y2Z2	83	1007.76	107.445	1.65951	146	16	2.48472	0.235336		46	10.333	4.09	11.113	43.7305	21.5946	47.7876	T
X3Y2Z2	88	1001.89	108.78	1.68901	154	17	2.85338	0.236285		47	10.2482	4.908	11.3628	53.1168	25.5904	57.2272	T
X3Y2Z2	76	1006.79	108.601	1.52372	133	15	2.62113	0.203348		48	10.7986	3.272	11.2834	52.8801	16.8569	54.7213	T
X4Y1Z1	80	1013.61	109.234	2.13985	138	16	2.81447	0.130716		49	8.36502	2.454	8.71755	78.1994	16.3498	78.6831	T
X4Y1Z1	73	998.033	105.256	1.75844	133	16	2.8674	0.23036		50	13.1707	2.454	13.3973	44.6354	10.5545	45.6088	T
X4Y1Z1	70	997.972	104.821	1.56585	128	15	2.6567	0.348378		51	13.3617	2.454	13.5852	83.4303	10.4069	83.5388	T
X4Y1Z1	90	1006.79	109.592	2.01589	156	17	2.83603	0.542357		52	11.574	3.272	12.0276	61.1423	15.7858	62.3265	T
X4Y1Z1	75	996.032	105.982	1.54074	136	16	2.74872	0.279249		53	11.4804	2.454	11.7398	34.064	12.0657	35.8932	T
X4Y1Z1	90	997.995	107.233	1.12009	160	17	2.73789	0.373405		54	14.1593	1.636	14.2535	53.3212	6.59088	53.6028	T
X4Y1Z1	73	998.989	111.952	1.87668	125	15	2.88783	0.144217		55	12.6993	2.454	12.9342	60.0586	10.937	60.6562	T
X4Y1Z1	81	1003.84	115.417	1.59846	134	15	2.68576	0.126093		56	12.7191	1.636	12.8239	48.0286	7.32945	48.4484	T
X4Y2Z2	82	993.098	111.811	2.30086	141	16	2.71434	0.145035		57	10.5472	1.636	10.6734	72.5814	8.81698	72.7937	T
X4Y2Z2	85	1010.66	115.586	1.93629	139	15	2.33556	0.465126		58	13.5529	4.09	14.1565	36.4997	16.7928	39.6838	T
X4Y2Z2	75	1011.69	112.398	2.41577	126	15	2.55476	0.539518		59	12.1976	1.636	12.3068	46.4932	7.63921	46.974	T
X4Y2Z2	82	993.17	108.911	2.12472	145	16	2.93486	0.21067		60	11.7274	1.636	11.8409	29.0107	7.94166	29.9867	T
X4Y2Z2	80	1020.49	113.249	2.30645	132	15	2.71932	0.61332		61	13.2931	4.09	13.9081	8.91055	17.102	19.2224	T
X4Y2Z2	81	1005.91	112.628	2.94884	137	16	2.75423	0.0978938		62	8.15698	2.454	8.51812	70.9567	16.7437	71.7932	T
X4Y2Z2	73	987.214	105.672	2.31428	134	16	2.55892	0.162526		63	14.0566	1.636	14.1515	25.2825	6.63858	26.084	T
X4Y2Z2	70	1007.72	104.22	1.41215	127	15	2.74856	0.349769		64	12.4744	2.454	12.7134	82.4379	11.1293	82.5809	T
										65	9.70776	3.272	10.2443	70.6057	18.6264	71.6589	T
										66	13.1141	2.454	13.3418	47.3873	10.599	48.2802	T
										67	10.4711	2.454	10.7548	74.9217	13.1898	75.3285	T
										68	11.2063	1.636	11.3251	54.7424	8.30591	55.1662	T
										69	12.1863	3.272	12.6179	73.4534	15.0293	74.0348	T
										70	10.034	1.636	10.1665	71.5782	9.26035	71.8267	T
										71	8.74499	2.454	9.08278	89.4966	15.6751	89.5153	T
										72	8.8696	3.272	9.45388	68.8285	20.249	70.1938	T
										73	9.40145	3.272	9.95456	64.8821	19.1895	66.3657	T
										74	13.1037	2.454	13.3315	72.7481	10.6072	73.0519	T
										75	13.3137	2.454	13.538	45.4796	10.4436	46.4057	T
										76	9.59722	2.454	9.906	62.8094	14.3432	63.7232	T
										77	11.3563	2.454	11.6184	77.975	12.1937	78.2502	T
										78	9.06803	4.09	9.94772	78.5393	24.2771	79.5647	T
										79	11.3563	2.454	11.6184	51.3776	12.1937	52.4031	T
										80	10.1904	4.908	11.3107	81.5237	25.7169	82.3686	T
										81	13.0267	4.09	13.6537	78.7877	17.4308	79.3088	T
										82	9.14002	2.454	9.46373	54.2488	15.0289	55.6475	T
										83	11.3189	2.454	11.5819	41.2331	12.2327	42.6962	T
										84	13.4626	2.454	13.6844	45.1852	10.3306	46.1008	T
										85	11.8299	1.636	11.9425	0.54944	7.87368	7.89271	T
										86	12.9669	3.272	13.3733	76.9424	14.1621	77.346	T
										87	13.6126	2.454	13.832	84.0435	10.2192	84.1383	T
										88	12.3278	3.272	12.7546	33.8953	14.8645	36.6516	T
										89	13.5832	1.636	13.6814	25.3728	6.8678	26.2263	T
										90	13.1278	2.454	13.3552	32.437	10.5882	33.9412	T
										91	10.9559	1.636	11.0774	67.7862	8.49298	68.0426	T
										92	13.9355	1.636	14.0312	56.079	6.69577	56.3414	T
										93	10.668	2.454	10.9466	61.9287	12.9547	62.7037	T
										94	10.876	2.454	11.1494	80.3476	12.715	80.5865	T
										95	11.2704	3.272	11.7357	77.0397	16.189	77.562	T
										96	8.74978	1.636	8.90141	80.4048	10.5907	80.5697	T
										97	13.3959	1.636	13.4954	23.046	6.96288	24.0199	T
										98	9.88322	1.636	10.0177	74.2306	9.39912	74.4477	T
										99	13.0363	1.636	13.1386	32.972	7.15297	33.6532	T
										100	10.5472	2.454	10.829	54.4292	13.0978	55.4882	T
