# Supplementary material for: OLG: a new potential reference material for apatite (U–Th)/He dating
Source: Royal Society of Chemistry journal article supplement (doi:10.1039/d5ja00246j), 2025-11-25
Supplement: d5ja00246j3.xlsx [file d5ja00246j3.xlsx]

## Sheet: Sheet1
Sample	He_number	U238_atoms	U238_atoms_SE	Th232_atoms	Th232_atoms_SE	He_atoms	He_atoms_SE	Age (Ma)	± σ (Ma)	Th/U	Comments
OLG apatite
X1Y1Z1-1	6954	3090000000000	106000000000	25000000000000	800000000000	2800000000000	28300000000	243.1	6.3	8.1	Outlier
X1Y1Z1-2	6956	3070000000000	91400000000	25000000000000	731000000000	2280000000000	23000000000	198.8	4.7	8.2
X1Y1Z1-3	6796	2550000000000	93000000000	20400000000000	684000000000	2050000000000	20800000000	217.8	5.9	8
X1Y1Z1-4	6798	2150000000000	56800000000	17500000000000	519000000000	1720000000000	17400000000	214.3	5	8.1
X1Y1Z1-5	9729	2370000000000	83900000000	21000000000000	701000000000	2050000000000	21200000000	218.8	5.9	8.8
X1Y1Z1-6	9731	3770000000000	108000000000	31900000000000	870000000000	3040000000000	31400000000	210.4	4.8	8.5
X1Y1Z1-7	9733	3120000000000	112000000000	27600000000000	1210000000000	2660000000000	27600000000	216	7.1	8.9
X1Y2Z2-1	9798	1930000000000	59600000000	9780000000000	433000000000	763000000000	7480000000	140.8	4.1	5.1	Outlier
X1Y2Z2-2	9800	3170000000000	99800000000	25600000000000	771000000000	2540000000000	25700000000	215.5	5.3	8.1
X1Y2Z2-3	9802	2190000000000	63200000000	11600000000000	309000000000	1230000000000	12500000000	194.5	4.2	5.3
X1Y2Z2-4	9972	3280000000000	93700000000	26100000000000	720000000000	1980000000000	19600000000	164.3	3.7	8	Outlier
X1Y2Z2-5	9974	1060000000000	34000000000	9290000000000	268000000000	889000000000	9090000000	213.8	5.1	8.8
X1Y2Z2-6	9976	1100000000000	40100000000	10200000000000	266000000000	925000000000	9490000000	206.4	4.8	9.2
X1Y2Z2-7	9978	2460000000000	79500000000	22600000000000	664000000000	2300000000000	23800000000	230.7	5.6	9.2
X2Y1Z1-1	6966	1800000000000	2420000000000	8240000000000	6230000000000	3490000000000	35400000000	704.6	519.1	4.6	Grain lost
X2Y1Z1-2	6968	3350000000000	109000000000	24800000000000	764000000000	2570000000000	26100000000	218.1	5.4	7.4
X2Y1Z1-3	6820	3330000000000	85300000000	26900000000000	808000000000	2630000000000	26600000000	212.4	5	8.1
X2Y1Z1-4	6822	3060000000000	89700000000	24400000000000	685000000000	2290000000000	23200000000	203.3	4.7	8
X2Y1Z1-5	9762	3810000000000	122000000000	29800000000000	1110000000000	3000000000000	31200000000	216.2	6.1	7.8
X2Y1Z1-6	9764	4150000000000	121000000000	32600000000000	1580000000000	3100000000000	32200000000	204.6	7	7.9
X2Y1Z1-7	9766	5450000000000	253000000000	41800000000000	1360000000000	3940000000000	40500000000	201.1	5.7	7.7
X2Y2Z2-1	6808	3740000000000	111000000000	29800000000000	1370000000000	2890000000000	29300000000	209.7	6.9	8
X2Y2Z2-2	6810	1980000000000	56000000000	16000000000000	454000000000	1660000000000	16700000000	225.3	5.2	8.1
X2Y2Z2-3	7375	952000000000	31200000000	7760000000000	284000000000	818000000000	8280000000	229.6	6.4	8.1
X2Y2Z2-4	7377	2880000000000	96800000000	23800000000000	706000000000	2360000000000	23900000000	217.1	5.3	8.3
X2Y2Z2-5	9772	18400000000000	613000000000	142000000000000	8180000000000	13200000000000	138000000000	198.8	7.9	7.7
X2Y2Z2-6	9774	9210000000000	260000000000	68600000000000	4420000000000	6460000000000	66700000000	198.8	8.5	7.4
X2Y2Z2-7	9776	14200000000000	482000000000	108000000000000	4960000000000	9700000000000	101000000000	191.2	6.3	7.6
X3Y1Z1-1	6970	664000000000	773000000000	5380000000000	7990000000000	1610000000000	16200000000	637.5	641.7	8.1	Grain lost
X3Y1Z1-2	6972	2670000000000	72300000000	21900000000000	708000000000	2120000000000	21500000000	211.5	5.3	8.2
X3Y1Z1-3	6784	3550000000000	97100000000	28500000000000	752000000000	2790000000000	28100000000	212.3	4.6	8
X3Y1Z1-4	6786	3840000000000	107000000000	31000000000000	928000000000	2930000000000	29500000000	205.3	4.9	8.1
X3Y1Z1-5	9778	6150000000000	208000000000	45100000000000	1530000000000	4730000000000	49700000000	219.9	5.8	7.3
X3Y1Z1-6	9784	5950000000000	308000000000	42900000000000	1700000000000	4100000000000	42400000000	199.3	6.5	7.2
X3Y1Z1-7	9786	3680000000000	195000000000	26800000000000	1240000000000	2670000000000	27700000000	208.5	7.6	7.3
X3Y2Z2-1	7371	2980000000000	84300000000	24200000000000	868000000000	2450000000000	24900000000	220.3	5.9	8.1
X3Y2Z2-2	7373	3520000000000	112000000000	29100000000000	908000000000	2950000000000	29800000000	221.9	5.6	8.2
X3Y2Z2-3	7285	1380000000000	48200000000	11300000000000	440000000000	1140000000000	11500000000	220.2	6.5	8.2
X3Y2Z2-4	7287	1440000000000	48000000000	11800000000000	510000000000	1090000000000	11000000000	201.8	6.4	8.2
X3Y2Z2-5	9745	2540000000000	88600000000	20200000000000	1010000000000	1850000000000	19500000000	198	7.1	8
X3Y2Z2-6	9747	3270000000000	106000000000	26200000000000	1400000000000	2410000000000	24900000000	199.4	7.5	8
X3Y2Z2-7	9760	6260000000000	243000000000	48200000000000	2240000000000	4720000000000	49200000000	209.2	7.1	7.7
X4Y1Z1-1	7273	3310000000000	103000000000	27500000000000	969000000000	2590000000000	26200000000	206.7	5.6	8.3
X4Y1Z1-2	7275	1940000000000	58900000000	16100000000000	486000000000	1570000000000	15900000000	213.9	5.2	8.3
X4Y1Z1-3	7387	1090000000000	35000000000	8680000000000	290000000000	802000000000	8120000000	199.9	5.2	8
X4Y1Z1-4	7389	2520000000000	85900000000	20100000000000	781000000000	1980000000000	20000000000	213.1	6.2	8
X4Y1Z1-5	9788	3110000000000	87100000000	21900000000000	872000000000	2170000000000	22900000000	204.8	5.8	7
X4Y1Z1-6	9790	3040000000000	162000000000	22200000000000	1140000000000	2120000000000	22100000000	200.1	7.8	7.3
X4Y1Z1-7	9796	7550000000000	313000000000	54600000000000	1660000000000	4860000000000	50400000000	186	4.9	7.2	Outlier
X4Y2Z2-1	7277	1570000000000	43500000000	13100000000000	490000000000	1180000000000	12000000000	198.1	5.5	8.3
X4Y2Z2-2	7279	2060000000000	64500000000	16900000000000	616000000000	1760000000000	17900000000	227.3	6.3	8.2
X4Y2Z2-3	7383	1420000000000	36300000000	11800000000000	502000000000	1160000000000	11800000000	215.7	6.6	8.3
X4Y2Z2-4	7385	2340000000000	73900000000	19100000000000	599000000000	1880000000000	18900000000	214.6	5.4	8.2
X4Y2Z2-5	9735	4710000000000	280000000000	41000000000000	2030000000000	3950000000000	40800000000	214.7	8.5	8.7
X4Y2Z2-6	9741	7560000000000	309000000000	65600000000000	3650000000000	5930000000000	61800000000	201.4	8.1	8.7
X4Y2Z2-7	9743	6350000000000	213000000000	51800000000000	2120000000000	5040000000000	52500000000	212.1	6.5	8.2
Durango apatite - age standard
DUR-84	6737	347000000000	13900000000	8280000000000	281000000000	89500000000	910000000	30.8	1	23.8
DUR-85	6749	370000000000	12000000000	8540000000000	274000000000	94900000000	959000000	31.5	0.9	23
DUR-86	6761	864000000000	27500000000	19800000000000	703000000000	219000000000	2220000000	31.3	1	23
DUR-87	6773	485000000000	14300000000	11100000000000	491000000000	119000000000	1200000000	30.4	1.2	23
DUR-88	6792	338000000000	12300000000	8050000000000	245000000000	88000000000	891000000	31.1	0.9	23.8
DUR-89	6804	254000000000	8340000000	6180000000000	194000000000	65600000000	667000000	30.3	0.9	24.4
DUR-90	6816	101000000000	3810000000	2070000000000	70900000000	21800000000	223000000	29.3	0.9	20.6
DUR-91	6828	428000000000	13400000000	10400000000000	332000000000	109000000000	1110000000	30	0.9	24.3
DUR-92	6840	463000000000	15600000000	11400000000000	400000000000	124000000000	1250000000	31.1	1	24.6
DUR-93	6926	301000000000	10800000000	7060000000000	235000000000	74200000000	755000000	29.9	0.9	23.5
DUR-94	6938	426000000000	12000000000	8240000000000	245000000000	98600000000	998000000	32.9	0.9	19.3
DUR-95	6950	586000000000	15300000000	11100000000000	481000000000	125000000000	1270000000	30.9	1.1	18.9
DUR-96	6962	408000000000	13000000000	8200000000000	251000000000	92500000000	935000000	31.2	0.9	20.1
DUR-97	6974	460000000000	12600000000	9590000000000	333000000000	105000000000	1070000000	30.5	0.9	20.8
DUR-98	6993	652000000000	20000000000	12000000000000	471000000000	131000000000	1330000000	29.7	1	18.4
DUR-233	9835	568000000000	37700000000	9640000000000	681000000000	107000000000	1130000000	29.9	1.8	17
DUR-234	9847	646000000000	17000000000	13300000000000	367000000000	142000000000	1500000000	29.7	0.8	20.6
DUR-235	9859	604000000000	19800000000	13700000000000	353000000000	149000000000	1570000000	30.6	0.8	22.8
DUR-236	9871	332000000000	13200000000	7710000000000	233000000000	82000000000	863000000	30.2	0.9	23.2
DUR-237	9902	452000000000	16200000000	9590000000000	299000000000	112000000000	1200000000	32.7	0.9	21.2
DUR-238	9914	734000000000	42200000000	16600000000000	486000000000	187000000000	1950000000	31.7	0.9	22.7
DUR-239	9926	957000000000	38800000000	24500000000000	865000000000	262000000000	2760000000	30.8	1	25.6
DUR-240	9938	824000000000	29400000000	18100000000000	720000000000	196000000000	2080000000	30.5	1.1	21.9
DUR-241	9950	1160000000000	38800000000	25300000000000	1540000000000	266000000000	2810000000	29.5	1.5	21.8
Q_standard				Q0	13.4699	QDF	0.999901	Na	6.02e+23	He_mol_volume (L/mol)	24.055
Q_standard	He_number	Q_number	He_atoms
Q1871_	6781	1871	2.80086e+11
Q1872_	6782	1872	2.80058e+11
Q1873_	6794	1873	2.80031e+11
Q1874_	6806	1874	2.80003e+11
Q1875_	6818	1875	2.79975e+11
Q1876_	6830	1876	2.79948e+11
Q1877_	6843	1877	2.7992e+11
Q1878_	6844	1878	2.79892e+11
Q1887_	6915	1887	2.79643e+11
Q1888_	6916	1888	2.79615e+11
Q1889_	6928	1889	2.79587e+11
Q1890_	6940	1890	2.7956e+11
Q1891_	6952	1891	2.79532e+11
Q1892_	6964	1892	2.79504e+11
Q1893_	6977	1893	2.79477e+11
Q1894_	6978	1894	2.79449e+11
Q1944_	7368	1944	2.78069e+11
Q1945_	7369	1945	2.78041e+11
Q1946_	7381	1946	2.78014e+11
Q1947_	7394	1947	2.77986e+11
Q1948_	7395	1948	2.77959e+11
Q2239_	9690	2239	2.70063e+11
Q2240_	9691	2240	2.70037e+11
Q2241_	9703	2241	2.7001e+11
Q2242_	9715	2242	2.69983e+11
Q2243_	9727	2243	2.69956e+11
Q2244_	9739	2244	2.6993e+11
Q2245_	9752	2245	2.69903e+11
Q2246_	9753	2246	2.69876e+11
Q2247_	9757	2247	2.69849e+11
Q2248_	9758	2248	2.69823e+11
Q2249_	9770	2249	2.69796e+11
Q2250_	9782	2250	2.69769e+11
Q2251_	9794	2251	2.69743e+11
Q2252_	9806	2252	2.69716e+11
Q2253_	9819	2253	2.69689e+11
Q2254_	9820	2254	2.69662e+11
Q2263_	9891	2263	2.69422e+11
Q2264_	9892	2264	2.69396e+11
Q2265_	9904	2265	2.69369e+11
Q2266_	9916	2266	2.69342e+11
Q2267_	9928	2267	2.69316e+11
Q2268_	9940	2268	2.69289e+11
Q2269_	9953	2269	2.69262e+11
Q2271_	9958	2271	2.69209e+11
Q2272_	9959	2272	2.69182e+11
Q2273_	9983	2273	2.69156e+11
Q2274_	9984	2274	2.69129e+11
